# Supplementary material for: Transcription factors induce differential splicing of duplicated ribosomal protein genes during meiosis
Source: Research Square preprint supplement (doi:10.21203/rs.3.rs-2355148/v1), 2023-01-12
Supplement: Supplementary file 1 [file 136b39d7e22a899876e7110a.xlsx]

## Sheet: Table S1
Table S1. Strains used in this study
Name	Genotype	Plasmid	Mating type	Source	Note
PCM2101	his3Δ200 leu2Δ0 lys2Δ0 ura3Δ0 His6-RPS9B; rps9aΔ::HIS3	[pHis-RPS9A-iRM2; LEU2]	Mat a	This study
PCM2102	his3Δ200 leu2Δ0 lys2Δ0 ura3Δ0 His6-RPS9B; rps9aΔ::HIS3	[pHis-RPS9A; LEU2]	Mat a	This study
CPY916	his3Δ200 leu2Δ0 lys2Δ0 ura3Δ0	[pRS315; LEU2]	Mat a	Petibon et al, 2016
PCM2016	his3Δ200 leu2Δ0 lys2Δ0 ura3Δ0 taf14∆::HIS3	[pRS315; LEU2]	Mat a	This study
PCM2017	his3Δ200 leu2Δ0 lys2Δ0 ura3Δ0 taf14∆::HIS3	[pRS315; LEU2]	Mat a	This study
PCM2018	his3Δ200 leu2Δ0 lys2Δ0 ura3Δ0 taf14∆::HIS3	[pRS315; LEU2]	Mat a	This study
PCM2025	taf14∆::HIS3/taf14∆::KMX	[pRS315; LEU2]	Diploid	This study
PCM2026	taf14∆::HIS3/taf14∆::KMX	[pRS315; LEU2]	Diploid	This study
PCM2027	taf14∆::HIS3/taf14∆::KMX	[pRS315; LEU2]	Diploid	This study
PCM2040	rim101∆::KMX/rim101∆::HIS3	[pRS315; LEU2]	Diploid	This study
PCM2041	rim101∆::KMX/rim101∆::HIS3	[pRS315; LEU2]	Diploid	This study
PCM2042	rim101∆::KMX/rim101∆::HIS3	[pRS315; LEU2]	Diploid	This study
PCM2044	his3Δ200 leu2Δ0 lys2Δ0 ura3Δ0 rim101∆::HIS3	[pRS315; LEU2]	Mat a	This study
PCM2045	his3Δ200 leu2Δ0 lys2Δ0 ura3Δ0 rim101∆::HIS3	[pRS315; LEU2]	Mat a	This study
PCM2046	his3Δ200 leu2Δ0 lys2Δ0 ura3Δ0 rim101∆::HIS3	[pRS315; LEU2]	Mat a	This study
PCM2057	his3Δ200/his3D200 leu2Δ0/leu2D0 lys2Δ0/lys2D0 ura3Δ0/ura3D0 rps9a∆i/rps9aDi	[pRS315; LEU2]	Diploid	This study
PCM2058	his3Δ200/his3D200 leu2Δ0/leu2D0 lys2Δ0/lys2D0 ura3Δ0/ura3D0 rps9a∆i/rps9aDi	[pRS315; LEU2]	Diploid	This study
PCM2059	his3Δ200/his3D200 leu2Δ0/leu2D0 lys2Δ0/lys2D0 ura3Δ0/ura3D0 rps9a∆i/rps9aDi	[pRS315; LEU2]	Diploid	This study
PCM2064	his3Δ200 leu2Δ0 lys2Δ0 ura3Δ0 rps9a∆i	[pRS315; LEU2]	Mat a	This study
PCM2065	his3Δ200 leu2Δ0 lys2Δ0 ura3Δ0 rps9a∆i	[pRS315; LEU2]	Mat a	This study
PCM2066	his3Δ200 leu2Δ0 lys2Δ0 ura3Δ0 rps9a∆i	[pRS315; LEU2]	Mat a	This study
JPY12B5	his3Δ200/his3D200 leu2Δ0/leu2D0 lys2Δ0/lys2D0 ura3Δ0/ura3D0		Diploid	Parenteau et al, 2015
PCM2103	rps9a∆::HIS3/rps9a∆::KMX		Diploid	This study	in JPY12B5
PCM2104	rps9a∆::HIS3/rps9a∆::KMX		Diploid	This study	in JPY12B5
PCM2105	rps9a∆::HIS3/rps9a∆::KMX		Diploid	This study	in JPY12B5
PCM2106	rps9a∆::HIS3/rps9a∆::KMX		Diploid	This study	in JPY12B5
MCY1336	his3Δ200/his3D200 leu2Δ0/leu2D0 lys2Δ0/lys2D0 ura3Δ0/ura3D0 SPS2-GFP::KMX/SPS2-GFP::KMX		Diploid	This study
MCY1337	his3Δ200/his3D200 leu2Δ0/leu2D0 lys2Δ0/lys2D0 ura3Δ0/ura3D0 SPS2-GFP::KMX/SPS2-GFP::KMX		Diploid	This study
MCY1338	his3Δ200/his3D200 leu2Δ0/leu2D0 lys2Δ0/lys2D0 ura3Δ0/ura3D0 SPS2-GFP::KMX/SPS2-GFP::KMX		Diploid	This study
MCY1339	his3Δ200/his3D200 leu2Δ0/leu2D0 lys2Δ0/lys2D0 ura3Δ0/ura3D0 rps9aD::HIS3/rps9aD::URA3 SPS2-GFP::KMX/SPS2-GFP::KMX		Diploid	This study
MCY1340	his3Δ200/his3D200 leu2Δ0/leu2D0 lys2Δ0/lys2D0 ura3Δ0/ura3D0 rps9aD::HIS3/rps9aD::URA3 SPS2-GFP::KMX/SPS2-GFP::KMX		Diploid	This study
MCY1341	his3Δ200/his3D200 leu2Δ0/leu2D0 lys2Δ0/lys2D0 ura3Δ0/ura3D0 rps9aD::HIS3/rps9aD::URA3 SPS2-GFP::KMX/SPS2-GFP::KMX		Diploid	This study
936	his3Δ1 leu2Δ0 ura3Δ0 met15Δ		Mat a	Yeast KO strains of Open Biosystems	RIM101∆
5021	his3Δ1 leu2Δ0 ura3Δ0 met15Δ		Mat a	Yeast KO strains of Open Biosystems	NNK1∆
2123	his3Δ1 leu2Δ0 ura3Δ0 met15Δ		Mat a	Yeast KO strains of Open Biosystems	TAF14∆
3059	his3Δ1 leu2Δ0 ura3Δ0 met15Δ		Mat a	Yeast KO strains of Open Biosystems	RIB1∆
3218	his3Δ1 leu2Δ0 ura3Δ0 met15Δ		Mat a	Yeast KO strains of Open Biosystems	SPT7∆
3767	his3Δ1 leu2Δ0 ura3Δ0 met15Δ		Mat a	Yeast KO strains of Open Biosystems	BDF2∆
537	his3Δ1 leu2Δ0 ura3Δ0 met15Δ		Mat a	Yeast KO strains of Open Biosystems	SRC1∆
366	his3Δ1 leu2Δ0 ura3Δ0 met15Δ		Mat a	Yeast KO strains of Open Biosystems	CLN3∆
4341	his3Δ1 leu2Δ0 ura3Δ0 met15Δ		Mat a	Yeast KO strains of Open Biosystems	GIN4∆
6961	his3Δ1 leu2Δ0 ura3Δ0 met15Δ		Mat a	Yeast KO strains of Open Biosystems	RPS9B∆
6847	his3Δ1 leu2Δ0 ura3Δ0 met15Δ		Mat a	Yeast KO strains of Open Biosystems	UTR1∆
2747	his3Δ1 leu2Δ0 ura3Δ0 met15Δ		Mat a	Yeast KO strains of Open Biosystems	RPS9A∆
1428	his3Δ1 leu2Δ0 ura3Δ0 met15Δ		Mat a	Yeast KO strains of Open Biosystems	CKA1∆
2565	his3Δ1 leu2Δ0 ura3Δ0 met15Δ		Mat a	Yeast KO strains of Open Biosystems	EMC2∆
5172	his3Δ1 leu2Δ0 ura3Δ0 met15Δ		Mat a	Yeast KO strains of Open Biosystems	RED1∆
1660	his3Δ1 leu2Δ0 ura3Δ0 met15Δ		Mat a	Yeast KO strains of Open Biosystems	PIP2∆
4921	his3Δ1 leu2Δ0 ura3Δ0 met15Δ		Mat a	Yeast KO strains of Open Biosystems	STB6∆
5336	his3Δ1 leu2Δ0 ura3Δ0 met15Δ		Mat a	Yeast KO strains of Open Biosystems	ASI3∆
2465	his3Δ1 leu2Δ0 ura3Δ0 met15Δ		Mat a	Yeast KO strains of Open Biosystems	NPT1∆
6053	his3Δ1 leu2Δ0 ura3Δ0 met15Δ		Mat a	Yeast KO strains of Open Biosystems	FPR4∆
6209	his3Δ1 leu2Δ0 ura3Δ0 met15Δ		Mat a	Yeast KO strains of Open Biosystems	RCO1∆
5156	his3Δ1 leu2Δ0 ura3Δ0 met15Δ		Mat a	Yeast KO strains of Open Biosystems	IRC20∆
2605	his3Δ1 leu2Δ0 ura3Δ0 met15Δ		Mat a	Yeast KO strains of Open Biosystems	RSF2∆
2447	his3Δ1 leu2Δ0 ura3Δ0 met15Δ		Mat a	Yeast KO strains of Open Biosystems	ULS1∆
5340	his3Δ1 leu2Δ0 ura3Δ0 met15Δ		Mat a	Yeast KO strains of Open Biosystems	SPO1∆
1325	his3Δ1 leu2Δ0 ura3Δ0 met15Δ		Mat a	Yeast KO strains of Open Biosystems	SAP185∆
6054	his3Δ1 leu2Δ0 ura3Δ0 met15Δ		Mat a	Yeast KO strains of Open Biosystems	HMG2∆
4366	his3Δ1 leu2Δ0 ura3Δ0 met15Δ		Mat a	Yeast KO strains of Open Biosystems	KRE28∆
7104	his3Δ1 leu2Δ0 ura3Δ0 met15Δ		Mat a	Yeast KO strains of Open Biosystems	MLP1∆
3089	his3Δ1 leu2Δ0 ura3Δ0 met15Δ		Mat a	Yeast KO strains of Open Biosystems	KIP1∆
592	his3Δ1 leu2Δ0 ura3Δ0 met15Δ		Mat a	Yeast KO strains of Open Biosystems	SPO20∆
1234	his3Δ1 leu2Δ0 ura3Δ0 met15Δ		Mat a	Yeast KO strains of Open Biosystems	RPS14B∆
6522	his3Δ1 leu2Δ0 ura3Δ0 met15Δ		Mat a	Yeast KO strains of Open Biosystems	GTR1∆
5968	his3Δ1 leu2Δ0 ura3Δ0 met15Δ		Mat a	Yeast KO strains of Open Biosystems	MGA2∆
1697	his3Δ1 leu2Δ0 ura3Δ0 met15Δ		Mat a	Yeast KO strains of Open Biosystems	TOP1∆
7182	his3Δ1 leu2Δ0 ura3Δ0 met15Δ		Mat a	Yeast KO strains of Open Biosystems	SNT1∆
489	his3Δ1 leu2Δ0 ura3Δ0 met15Δ		Mat a	Yeast KO strains of Open Biosystems	TDA9∆
3398	his3Δ1 leu2Δ0 ura3Δ0 met15Δ		Mat a	Yeast KO strains of Open Biosystems	SHG1∆
6187	his3Δ1 leu2Δ0 ura3Δ0 met15Δ		Mat a	Yeast KO strains of Open Biosystems	STB2∆
3105	his3Δ1 leu2Δ0 ura3Δ0 met15Δ		Mat a	Yeast KO strains of Open Biosystems	NUP170∆
559	his3Δ1 leu2Δ0 ura3Δ0 met15Δ		Mat a	Yeast KO strains of Open Biosystems	TRM9∆
1782	his3Δ1 leu2Δ0 ura3Δ0 met15Δ		Mat a	Yeast KO strains of Open Biosystems	TSR3∆
4319	his3Δ1 leu2Δ0 ura3Δ0 met15Δ		Mat a	Yeast KO strains of Open Biosystems	VPS72∆
3682	his3Δ1 leu2Δ0 ura3Δ0 met15Δ		Mat a	Yeast KO strains of Open Biosystems	PEP7∆
1643	his3Δ1 leu2Δ0 ura3Δ0 met15Δ		Mat a	Yeast KO strains of Open Biosystems	REV1∆
6200	his3Δ1 leu2Δ0 ura3Δ0 met15Δ		Mat a	Yeast KO strains of Open Biosystems	UBX4∆
5280	his3Δ1 leu2Δ0 ura3Δ0 met15Δ		Mat a	Yeast KO strains of Open Biosystems	ROM2∆
6267	his3Δ1 leu2Δ0 ura3Δ0 met15Δ		Mat a	Yeast KO strains of Open Biosystems	RRI2∆
6157	his3Δ1 leu2Δ0 ura3Δ0 met15Δ		Mat a	Yeast KO strains of Open Biosystems	SPT2∆
212	his3Δ1 leu2Δ0 ura3Δ0 met15Δ		Mat a	Yeast KO strains of Open Biosystems	VTC1∆
2738	his3Δ1 leu2Δ0 ura3Δ0 met15Δ		Mat a	Yeast KO strains of Open Biosystems	RPS6A∆
6990	his3Δ1 leu2Δ0 ura3Δ0 met15Δ		Mat a	Yeast KO strains of Open Biosystems	DBF2∆
4393	his3Δ1 leu2Δ0 ura3Δ0 met15Δ		Mat a	Yeast KO strains of Open Biosystems	PGD1∆
4822	his3Δ1 leu2Δ0 ura3Δ0 met15Δ		Mat a	Yeast KO strains of Open Biosystems	TDH3∆
3379	his3Δ1 leu2Δ0 ura3Δ0 met15Δ		Mat a	Yeast KO strains of Open Biosystems	ERT1∆
1080	his3Δ1 leu2Δ0 ura3Δ0 met15Δ		Mat a	Yeast KO strains of Open Biosystems	PUS1∆
3868	his3Δ1 leu2Δ0 ura3Δ0 met15Δ		Mat a	Yeast KO strains of Open Biosystems	UGA3∆
977	his3Δ1 leu2Δ0 ura3Δ0 met15Δ		Mat a	Yeast KO strains of Open Biosystems	SPO13∆
2412	his3Δ1 leu2Δ0 ura3Δ0 met15Δ		Mat a	Yeast KO strains of Open Biosystems	NFI1∆
1156	his3Δ1 leu2Δ0 ura3Δ0 met15Δ		Mat a	Yeast KO strains of Open Biosystems	CAF40∆
761	his3Δ1 leu2Δ0 ura3Δ0 met15Δ		Mat a	Yeast KO strains of Open Biosystems	ECM5∆
6056	his3Δ1 leu2Δ0 ura3Δ0 met15Δ		Mat a	Yeast KO strains of Open Biosystems	RIF2∆
4044	his3Δ1 leu2Δ0 ura3Δ0 met15Δ		Mat a	Yeast KO strains of Open Biosystems	FOB1∆
4231	his3Δ1 leu2Δ0 ura3Δ0 met15Δ		Mat a	Yeast KO strains of Open Biosystems	SXM1∆
1904	his3Δ1 leu2Δ0 ura3Δ0 met15Δ		Mat a	Yeast KO strains of Open Biosystems	PTC7∆
3902	his3Δ1 leu2Δ0 ura3Δ0 met15Δ		Mat a	Yeast KO strains of Open Biosystems	RTN2∆
4437	his3Δ1 leu2Δ0 ura3Δ0 met15Δ		Mat a	Yeast KO strains of Open Biosystems	RPB9∆
5852	his3Δ1 leu2Δ0 ura3Δ0 met15Δ		Mat a	Yeast KO strains of Open Biosystems	IRC5∆
4582	his3Δ1 leu2Δ0 ura3Δ0 met15Δ		Mat a	Yeast KO strains of Open Biosystems	KIP3∆
1044	his3Δ1 leu2Δ0 ura3Δ0 met15Δ		Mat a	Yeast KO strains of Open Biosystems	GAL4∆
355	his3Δ1 leu2Δ0 ura3Δ0 met15Δ		Mat a	Yeast KO strains of Open Biosystems	OAF1∆
4830	his3Δ1 leu2Δ0 ura3Δ0 met15Δ		Mat a	Yeast KO strains of Open Biosystems	ELP2∆
1573	his3Δ1 leu2Δ0 ura3Δ0 met15Δ		Mat a	Yeast KO strains of Open Biosystems	POM34∆
5811	his3Δ1 leu2Δ0 ura3Δ0 met15Δ		Mat a	Yeast KO strains of Open Biosystems	MSH3∆
4617	his3Δ1 leu2Δ0 ura3Δ0 met15Δ		Mat a	Yeast KO strains of Open Biosystems	RMR1∆
4208	his3Δ1 leu2Δ0 ura3Δ0 met15Δ		Mat a	Yeast KO strains of Open Biosystems	VPS74∆
5800	his3Δ1 leu2Δ0 ura3Δ0 met15Δ		Mat a	Yeast KO strains of Open Biosystems	AHC2∆
1076	his3Δ1 leu2Δ0 ura3Δ0 met15Δ		Mat a	Yeast KO strains of Open Biosystems	YPL216W∆
4864	his3Δ1 leu2Δ0 ura3Δ0 met15Δ		Mat a	Yeast KO strains of Open Biosystems	PUT3∆
7275	his3Δ1 leu2Δ0 ura3Δ0 met15Δ		Mat a	Yeast KO strains of Open Biosystems	BLM10∆
998	his3Δ1 leu2Δ0 ura3Δ0 met15Δ		Mat a	Yeast KO strains of Open Biosystems	NEL1∆
7170	his3Δ1 leu2Δ0 ura3Δ0 met15Δ		Mat a	Yeast KO strains of Open Biosystems	RIF1∆
2485	his3Δ1 leu2Δ0 ura3Δ0 met15Δ		Mat a	Yeast KO strains of Open Biosystems	WTM2∆
5055	his3Δ1 leu2Δ0 ura3Δ0 met15Δ		Mat a	Yeast KO strains of Open Biosystems	LOS1∆
2278	his3Δ1 leu2Δ0 ura3Δ0 met15Δ		Mat a	Yeast KO strains of Open Biosystems	RPI1∆
7089	his3Δ1 leu2Δ0 ura3Δ0 met15Δ		Mat a	Yeast KO strains of Open Biosystems	CRP1∆
6158	his3Δ1 leu2Δ0 ura3Δ0 met15Δ		Mat a	Yeast KO strains of Open Biosystems	RAD4∆
2940	his3Δ1 leu2Δ0 ura3Δ0 met15Δ		Mat a	Yeast KO strains of Open Biosystems	EAF7∆
167	his3Δ1 leu2Δ0 ura3Δ0 met15Δ		Mat a	Yeast KO strains of Open Biosystems	EDC2∆
6645	his3Δ1 leu2Δ0 ura3Δ0 met15Δ		Mat a	Yeast KO strains of Open Biosystems	GOR1∆
2701	his3Δ1 leu2Δ0 ura3Δ0 met15Δ		Mat a	Yeast KO strains of Open Biosystems	XDJ1∆
3691	his3Δ1 leu2Δ0 ura3Δ0 met15Δ		Mat a	Yeast KO strains of Open Biosystems	IRC3∆
215	his3Δ1 leu2Δ0 ura3Δ0 met15Δ		Mat a	Yeast KO strains of Open Biosystems	PTP3∆
258	his3Δ1 leu2Δ0 ura3Δ0 met15Δ		Mat a	Yeast KO strains of Open Biosystems	GTT3∆
3253	his3Δ1 leu2Δ0 ura3Δ0 met15Δ		Mat a	Yeast KO strains of Open Biosystems	RAD16∆
2287	his3Δ1 leu2Δ0 ura3Δ0 met15Δ		Mat a	Yeast KO strains of Open Biosystems	MET18∆
2357	his3Δ1 leu2Δ0 ura3Δ0 met15Δ		Mat a	Yeast KO strains of Open Biosystems	RAS1∆
3516	his3Δ1 leu2Δ0 ura3Δ0 met15Δ		Mat a	Yeast KO strains of Open Biosystems	HOM2∆
5670	his3Δ1 leu2Δ0 ura3Δ0 met15Δ		Mat a	Yeast KO strains of Open Biosystems	SWP82∆
7303	his3Δ1 leu2Δ0 ura3Δ0 met15Δ		Mat a	Yeast KO strains of Open Biosystems	DAL81∆
4511	his3Δ1 leu2Δ0 ura3Δ0 met15Δ		Mat a	Yeast KO strains of Open Biosystems	ROG1∆
3280	his3Δ1 leu2Δ0 ura3Δ0 met15Δ		Mat a	Yeast KO strains of Open Biosystems	BMT2∆
3219	his3Δ1 leu2Δ0 ura3Δ0 met15Δ		Mat a	Yeast KO strains of Open Biosystems	UBC4∆
3575	his3Δ1 leu2Δ0 ura3Δ0 met15Δ		Mat a	Yeast KO strains of Open Biosystems	ADR1∆
6806	his3Δ1 leu2Δ0 ura3Δ0 met15Δ		Mat a	Yeast KO strains of Open Biosystems	TDH2∆
5348	his3Δ1 leu2Δ0 ura3Δ0 met15Δ		Mat a	Yeast KO strains of Open Biosystems	RCM1∆
5886	his3Δ1 leu2Δ0 ura3Δ0 met15Δ		Mat a	Yeast KO strains of Open Biosystems	PHO81∆
5428	his3Δ1 leu2Δ0 ura3Δ0 met15Δ		Mat a	Yeast KO strains of Open Biosystems	SUT2∆
2315	his3Δ1 leu2Δ0 ura3Δ0 met15Δ		Mat a	Yeast KO strains of Open Biosystems	UBP7∆
4082	his3Δ1 leu2Δ0 ura3Δ0 met15Δ		Mat a	Yeast KO strains of Open Biosystems	LEU3∆
6834	his3Δ1 leu2Δ0 ura3Δ0 met15Δ		Mat a	Yeast KO strains of Open Biosystems	HUL4∆
7270	his3Δ1 leu2Δ0 ura3Δ0 met15Δ		Mat a	Yeast KO strains of Open Biosystems	DEG1∆
933	his3Δ1 leu2Δ0 ura3Δ0 met15Δ		Mat a	Yeast KO strains of Open Biosystems	ECM29∆
397	his3Δ1 leu2Δ0 ura3Δ0 met15Δ		Mat a	Yeast KO strains of Open Biosystems	SWC3∆
1837	his3Δ1 leu2Δ0 ura3Δ0 met15Δ		Mat a	Yeast KO strains of Open Biosystems	CKA2∆
3514	his3Δ1 leu2Δ0 ura3Δ0 met15Δ		Mat a	Yeast KO strains of Open Biosystems	RPA14∆
3994	his3Δ1 leu2Δ0 ura3Δ0 met15Δ		Mat a	Yeast KO strains of Open Biosystems	UBC5∆
802	his3Δ1 leu2Δ0 ura3Δ0 met15Δ		Mat a	Yeast KO strains of Open Biosystems	SKY1∆
LY77	ho::LYS2 lys2 ura3 leu2::hisG his3::hisG trp1:hisG		Mat a	Soni Lacefield lab
LY80	ho::LYS2 lys2 ura3 leu2::hisG his3::hisG trp1:hisG		Mat alpha	Soni Lacefield lab
MCY1342	ho::LYS2/ho::LYS2 lys2/lys2 ura3/ura3 leu2::hisGleu2::hisG his3::hisG/his3::hisG trp1:hisG/trp1::hisG		Diploid	This study
MCY1343	ho::LYS2/ho::LYS2 lys2/lys2 ura3/ura3 leu2::hisGleu2::hisG his3::hisG/his3::hisG trp1:hisG/trp1::hisG rps9aD::His3/rps9aD::TRP1		Diploid	This study
