# Supplementary material for: Transcription factors induce differential splicing of duplicated ribosomal protein genes during meiosis
Source: Research Square preprint supplement (doi:10.21203/rs.3.rs-2355148/v1), 2023-01-12
Supplement: Supplementary file 2 [file 65e4fe95385cc6d9832d48a4.xlsx]

## Sheet: Table S4
Table S4. Mass spectrometry and splicing assay screen result and confirmation
Systematic name	Gene name	Essentiala	Nuclear Localizationb	Splicing efficency of iA at 2H	Splicing efficency of iA at 4H	Splicing efficency of iB at 2H	Splicing efficency of iB at 4H	Avg Log2 Splicing efficiency of iA	Avg Log2 Splicing efficiency of iB	Difference in Log2 Splicing efficiency (iA-iB)	Log2FC Endogenous Splicing efficiency (RPS9A/RPS9B)	Log2FC Endogenous mRNA expression (RPS9A/RPS9B)	Description
YHL027W	RIM101	N	Y	6.34261	6.8213	2.2852	2.29304	2.71756	1.19479	1.52277	0.991935	1.51808	Cys2His2 zinc-finger transcriptional repressor
YKL171W	NNK1	N	Y	5.49241	3.61831	1.98587	2.0273	2.15638	1.00466	1.15171	-0.467727	0.326667	Protein kinase
YPL129W	TAF14	N	Y	3.00228	2.76993	1.47555	1.40954	1.52795	0.528242	0.999712	1.76779	1.01907	Subunit of TFIID, TFIIF, INO80, SWI/SNF, and NuA3 complexes
YBL033C	RIB1	N	Y	2.35637	2.26311	1.3379	1.49213	1.20743	0.498668	0.708765	0.269034	0.503333	GTP cyclohydrolase II
YBR081C	SPT7	N	Y	2.11678	2.19282	1.05988	1.13804	1.10733	0.13523	0.972099	-0.899517	0.461667	Subunit of the SAGA transcriptional regulatory complex
YDL070W	BDF2	N	Y	2.0098	1.72253	0.896606	0.939579	0.89579	-0.123684	1.01947	0.0344839	0.206949	Protein involved in transcription initiation
YML034W	SRC1	N	Y	1.8824	1.79655	1.28173	1.14701	0.878903	0.277985	0.600918	-0.198277	-0.143333	Inner nuclear membrane protein
YAL040C	CLN3	N	Y	1.85335	1.80231	1.0122	0.956267	0.86999	-0.0235083	0.893498	-0.135934	0.311667	G1 cyclin involved in cell cycle progression
YDR507C	GIN4	N	Y	1.7986	1.85253	1.09517	1.07137	0.868186	0.115306	0.752881	-0.181516	-0.0866667	Protein kinase involved in bud growth and assembly of the septin ring
YBR189W	RPS9B	N	Y	1.72007	1.74852	1.22983	1.08885	0.794302	0.210637	0.583664	NA	NA	Protein component of the small (40S) ribosomal subunit
YJR049C	UTR1	N	Y	2.09903	1.3469	1.35536	1.08802	0.749683	0.280193	0.46949	NA	NA	ATP-NADH kinase
YPL081W	RPS9A	N	Y	1.78454	1.57367	1.08929	1.01953	0.744844	0.0756443	0.6692	NA	NA	Protein component of the small (40S) ribosomal subunit
YIL035C	CKA1	N	Y	1.59175	1.74582	0.937247	1.01591	0.737259	-0.0353638	0.772623	NA	NA	Alpha catalytic subunit of casein kinase 2 (CK2)
YJR088C	EMC2	N	Y	1.64257	1.66179	0.823855	0.939038	0.724346	-0.18514	0.909487	NA	NA	Member of conserved ER transmembrane complex
YLR263W	RED1	N	Y	1.52432	1.60897	0.791846	0.917783	0.647149	-0.230241	0.87739	NA	NA	Protein component of the synaptonemal complex axial elements
YOR363C	PIP2	N	Y	1.57031	1.55475	0.820052	0.893702	0.643866	-0.224173	0.86804	NA	NA	Autoregulatory, oleate-activated transcription factor
YKL072W	STB6	N	Y	1.71085	1.41362	0.870492	0.944893	0.637054	-0.140937	0.777991	NA	NA	Protein that binds Sin3p in a two-hybrid assay
YNL008C	ASI3	N	Y	1.46809	1.59307	0.817033	0.947177	0.612875	-0.184913	0.797788	NA	NA	Subunit of the nuclear inner membrane Asi ubiquitin ligase complex
YOR209C	NPT1	N	Y	1.54793	1.46114	0.891097	0.872935	0.588715	-0.181199	0.769914	NA	NA	Nicotinate phosphoribosyltransferase
YLR449W	FPR4	N	Y	1.75433	1.27581	1.19744	1.03063	0.58117	0.151737	0.429433	NA	NA	Peptidyl-prolyl cis-trans isomerase (PPIase)
YMR075W	RCO1	N	Y	1.39561	1.60002	0.956933	0.990275	0.579491	-0.0388045	0.618295	NA	NA	Essential component of the Rpd3S histone deacetylase complex
YLR247C	IRC20	N	Y	1.52373	1.46369	0.785964	0.76789	0.578609	-0.364247	0.942856	NA	NA	E3 ubiquitin ligase and putative helicase
YJR127C	RSF2	N	Y	1.52085	1.45525	0.791056	0.866772	0.573071	-0.272212	0.845283	NA	NA	Zinc-finger protein
YOR191W	ULS1	N	Y	1.39026	1.57281	1.12104	1.22415	0.56435	0.228308	0.336042	NA	NA	Swi2/Snf2-related translocase, SUMO-Targeted Ubiquitin Ligase (STUbL)
YNL012W	SPO1	N	Y	1.47985	1.45383	1.08056	0.943321	0.552657	0.0138018	0.538855	NA	NA	Meiosis-specific prospore protein
YJL098W	SAP185	N	Y	1.46365	1.46481	0.809958	0.89499	0.550145	-0.232069	0.782214	NA	NA	Protein that forms a complex with the Sit4p protein phosphatase
YLR450W	HMG2	N	Y	1.47389	1.42116	0.770011	0.787319	0.533351	-0.361014	0.894365	NA	NA	HMG-CoA reductase
YDR532C	KRE28	N	Y	1.52071	1.36718	1.00087	0.975957	0.527977	-0.016928	0.544905	NA	NA	Subunit of a kinetochore-microtubule binding complex
YKR095W	MLP1	N	Y	1.46527	1.41774	0.915566	1.0417	0.52738	-0.0341641	0.561544	NA	NA	Myosin-like protein associated with the nuclear envelope
YBL063W	KIP1	N	Y	1.57067	1.3066	1.10175	0.997003	0.518598	0.0677323	0.450866	NA	NA	Kinesin-related motor protein
YMR017W	SPO20	N	Y	1.36058	1.41914	0.777808	0.976486	0.474618	-0.198421	0.673039	NA	NA	Meiosis-specific subunit of the t-SNARE complex
YJL191W	RPS14B	N	Y	1.35098	1.37407	0.786106	0.952834	0.446231	-0.208453	0.654684	NA	NA	Protein component of the small (40S) ribosomal subunit
YML121W	GTR1	N	Y	1.33022	1.39478	1.01158	1.04649	0.445856	0.0410868	0.404769	NA	NA	Subunit of a TORC1-stimulating GTPase complex
YIR033W	MGA2	N	Y	1.43105	1.24965	1.13251	1.07852	0.419302	0.144292	0.275011	NA	NA	ER membrane protein involved in regulation of OLE1 transcription
YOL006C	TOP1	N	Y	1.52206	1.63379	2.52375	2.50082	0.657126	1.32898	-0.671858	NA	NA	Topoisomerase I
YCR033W	SNT1	N	Y	1.24309	0.968967	1.54916	1.35237	0.134225	0.53349	-0.399265	NA	NA	Subunit of the Set3C deacetylase complex
YML081W	TDA9	N	Y	0.838469	0.877102	1.33935	1.42559	-0.221677	0.466546	-0.688223	NA	NA	Transcription factor that regulates acetate production
YBR258C	SHG1	N	Y	1.0709	1.1077	0.692147	0.73056	0.123194	-0.491887	0.615081	NA	NA	Subunit of the COMPASS (Set1C) complex
YMR053C	STB2	N	Y	1.24223	0.923826	0.779658	0.650244	0.0993118	-0.490017	0.589329	NA	NA	Protein that interacts with Sin3p in a two-hybrid assay
YBL079W	NUP170	N	Y	1.04893	0.735099	0.834017	0.677801	-0.187536	-0.411459	0.223923	NA	NA	Subunit of inner ring of nuclear pore complex (NPC)
YML014W	TRM9	N	Y	0.754478	0.760561	0.886082	0.93634	-0.400656	-0.134692	-0.265964	NA	NA	tRNA methyltransferase
YOR006C	TSR3	N	Y	0.590216	0.631222	0.938723	0.93789	-0.712233	-0.0918687	-0.620364	NA	NA	Protein required for 20S pre-rRNA processing
YDR485C	VPS72	N	Y	0.580885	0.585773	0.707001	0.678889	-0.777632	-0.529484	-0.248148	NA	NA	Htz1p-binding component of the SWR1 complex
YDR323C	PEP7	N	Y	0.438336	0.421837	0.346553	0.358655	-1.21757	-1.50409	0.286525	NA	NA	Adaptor protein involved in vesicle-mediated vacuolar protein sorting
YOR346W	REV1	N	Y	1.26073	1.37471	0.820853	0.935905	0.396693	-0.190184	0.586878	NA	NA	Deoxycytidyl transferase
YMR067C	UBX4	N	Y	1.41481	1.22104	1.14157	1.03622	0.39436	0.121175	0.273185	NA	NA	UBX domain-containing protein that interacts with Cdc48p
YLR371W	ROM2	N	Y	1.30673	1.2891	0.729816	0.814237	0.376162	-0.375438	0.7516	NA	NA	Guanine nucleotide exchange factor (GEF) for Rho1p and Rho2p
YOL117W	RRI2	N	Y	1.25287	1.32791	0.986059	1.14556	0.367197	0.0878971	0.2793	NA	NA	Subunit of the COP9 signalosome (CSN) complex
YER161C	SPT2	N	Y	1.39232	1.16965	1.03234	0.964589	0.35178	-0.0030476	0.354828	NA	NA	Protein involved in negative regulation of transcription
YER072W	VTC1	N	Y	1.27843	1.24712	0.854804	0.91365	0.336489	-0.178311	0.5148	NA	NA	Subunit of the vacuolar transporter chaperone (VTC) complex
YPL090C	RPS6A	N	Y	1.28988	1.22116	0.89695	0.715143	0.327747	-0.320299	0.648046	NA	NA	Protein component of the small (40S) ribosomal subunit
YGR092W	DBF2	N	Y	1.32381	1.16592	1.03269	0.981463	0.313083	0.00970978	0.303374	NA	NA	Ser/Thr kinase involved in transcription and stress response
YGL025C	PGD1	N	Y	1.30612	1.13041	1.07136	0.948553	0.281066	0.0116228	0.269443	NA	NA	Subunit of the RNA polymerase II mediator complex
YGR192C	TDH3	N	Y	1.30473	1.10975	1.08506	0.950785	0.266993	0.0224839	0.244509	NA	NA	Glyceraldehyde-3-phosphate dehydrogenase (GAPDH), isozyme 3
YBR239C	ERT1	N	Y	1.20254	1.18951	1.22279	1.31004	0.258226	0.339897	-0.0816704	NA	NA	Transcriptional regulator
YPL212C	PUS1	N	Y	1.21935	1.14652	1.15136	1.28142	0.241686	0.280543	-0.0388568	NA	NA	tRNA:pseudouridine synthase
YDL170W	UGA3	N	Y	1.22491	1.11332	1.2747	1.03376	0.223772	0.199032	0.0247403	NA	NA	Transcriptional activator for GABA-dependent induction of GABA genes
YHR014W	SPO13	N	Y	1.11503	1.2067	1.00201	1.06251	0.214077	0.0451869	0.16889	NA	NA	Meiotic regulator
YOR156C	NFI1	N	Y	1.24506	1.07769	1.04822	1.13627	0.21208	0.126126	0.0859545	NA	NA	SUMO E3 ligase
YNL288W	CAF40	N	Y	1.22692	1.07359	1.00086	1.06827	0.198743	0.048257	0.150486	NA	NA	Component of the CCR4-NOT transcriptional complex
YMR176W	ECM5	N	Y	1.11984	1.15054	1.08282	1.09056	0.182801	0.119931	0.06287	NA	NA	Subunit of the Snt2C complex
YLR453C	RIF2	N	Y	1.30729	0.982794	1.00243	0.878094	0.180772	-0.0920245	0.272796	NA	NA	Protein that binds to the Rap1p C-terminus
YDR110W	FOB1	N	Y	1.20101	1.05929	1.00372	0.945406	0.173674	-0.0378156	0.211489	NA	NA	Nucleolar protein that binds the rDNA replication fork barrier site
YDR395W	SXM1	N	Y	1.19871	1.0613	1.11193	1.03015	0.173655	0.0979544	0.0757005	NA	NA	Nuclear transport factor (karyopherin)
YHR076W	PTC7	N	Y	1.19329	1.06335	0.962315	1.03209	0.171778	-0.00492806	0.176706	NA	NA	Type 2C serine/threonine protein phosphatase (PP2C)
YDL204W	RTN2	N	Y	1.11047	1.11886	0.960498	1.01215	0.156599	-0.0203589	0.176958	NA	NA	Reticulon protein
YGL070C	RPB9	N	Y	1.15186	1.0786	1.26674	1.09898	0.156564	0.238642	-0.0820776	NA	NA	RNA polymerase II subunit B12.6
YFR038W	IRC5	N	Y	1.10711	1.10393	1.19505	1.13161	0.144721	0.217726	-0.0730051	NA	NA	Putative ATPase containing the DEAD/H helicase-related sequence motif
YGL216W	KIP3	N	Y	1.16298	1.04767	1.09473	1.01473	0.142505	0.0758411	0.0666635	NA	NA	Kinesin-related antiparallel sliding motor protein
YPL248C	GAL4	N	Y	1.07027	1.11721	1.12035	1.41794	0.12894	0.333871	-0.204931	NA	NA	DNA-binding transcription factor required for activating GAL genes
YAL051W	OAF1	N	Y	1.03808	1.12288	0.963634	1.01924	0.110562	-0.0129717	0.123534	NA	NA	Oleate-activated transcription factor
YGR200C	ELP2	N	Y	1.0764	1.06843	0.889537	0.9146	0.100854	-0.14883	0.249684	NA	NA	Subunit of Elongator complex
YLR018C	POM34	N	Y	1.03576	1.1001	1.0832	1.00988	0.0941602	0.064744	0.0294162	NA	NA	Subunit of the transmembrane ring of the nuclear pore complex (NPC)
YCR092C	MSH3	N	Y	1.11377	1.00589	1.02859	0.944814	0.0819568	-0.020616	0.102573	NA	NA	Mismatch repair protein
YGL250W	RMR1	N	Y	1.14737	0.960251	1.18748	0.990407	0.0699058	0.116999	-0.0470934	NA	NA	Protein required for meiotic recombination and gene conversion
YDR372C	VPS74	N	Y	0.936804	1.17029	0.907594	1.06534	0.066344	-0.0242815	0.0906255	NA	NA	Golgi phosphatidylinositol-4-kinase effector and PtdIns4P sensor
YCR082W	AHC2	N	Y	1.01845	1.07476	1.13082	1.09067	0.0651925	0.151292	-0.0860998	NA	NA	Component of the ADA histone acetyltransferase complex
YPL216W	YPL216W	N	Y	1.11274	0.975204	1.16955	1.20644	0.0589472	0.248356	-0.189409	NA	NA	Putative protein of unknown function
YKL015W	PUT3	N	Y	1.00896	1.07276	0.955764	1.09237	0.0571013	0.0310936	0.0260077	NA	NA	Transcriptional activator
YFL007W	BLM10	N	Y	1.0675	1.0136	0.990093	0.94586	0.0568588	-0.047333	0.104192	NA	NA	Proteasome activator
YHR035W	NEL1	N	Y	1.05944	1.02091	1.04481	0.991447	0.056579	0.0254241	0.031155	NA	NA	Activator of Sar1p GTPase activity
YBR275C	RIF1	N	Y	1.03723	1.04077	0.843401	0.771091	0.0551974	-0.310368	0.365566	NA	NA	Protein that binds to the Rap1p C-terminus
YOR229W	WTM2	N	Y	1.10283	0.970587	1.08689	0.983348	0.0490717	0.0479868	0.00108486	NA	NA	Transcriptional modulator
YKL205W	LOS1	N	Y	1.10997	0.949779	1.12115	0.999964	0.038091	0.0824638	-0.0443727	NA	NA	Nuclear pore protein
YIL119C	RPI1	N	Y	1.12649	0.935123	0.985476	0.971166	0.0375304	-0.0316583	0.0691887	NA	NA	Transcription factor, allelic differences between S288C and Sigma1278b
YHR146W	CRP1	N	Y	1.02583	1.00593	1.00159	0.981853	0.0226645	-0.0120624	0.0347269	NA	NA	Protein that binds to cruciform DNA structures
YER162C	RAD4	N	Y	1.04991	0.980622	1.01278	0.917166	0.0210153	-0.0532119	0.0742272	NA	NA	Protein that recognizes and binds damaged DNA (with Rad23p) during NER
YNL136W	EAF7	N	Y	1.06457	0.922689	1.01622	1.01475	-0.0129069	0.0221725	-0.0350794	NA	NA	Subunit of the NuA4 histone acetyltransferase complex
YER035W	EDC2	N	Y	1.00638	0.974662	0.989574	1.02618	-0.0139283	0.0110803	-0.0250086	NA	NA	RNA-binding protein that directly activates mRNA decapping
YNL274C	GOR1	N	Y	1.03351	0.939027	1.10035	1.04515	-0.0216018	0.100836	-0.122438	NA	NA	Glyoxylate reductase
YLR090W	XDJ1	N	Y	1.04131	0.923008	0.952177	0.970124	-0.0285937	-0.057229	0.0286353	NA	NA	Chaperone with a role in facilitating mitochondrial protein import
YDR332W	IRC3	N	Y	0.952825	1.0014	1.01368	0.961665	-0.0338504	-0.018399	-0.0154514	NA	NA	Double-stranded DNA-dependent helicase of the DExH/D-box family
YER075C	PTP3	N	Y	0.919616	1.02677	0.8559	1.09997	-0.0413942	-0.0435113	0.00211713	NA	NA	Phosphotyrosine-specific protein phosphatase
YEL017W	GTT3	N	Y	0.984026	0.958864	0.94108	1.00663	-0.0419173	-0.0390375	-0.00287984	NA	NA	Protein of unknown function may be involved in glutathione metabolism
YBR114W	RAD16	N	Y	1.12043	0.841286	1.13834	0.980356	-0.0426393	0.0791545	-0.121794	NA	NA	Nucleotide excision repair (NER) protein
YIL128W	MET18	N	Y	1.07606	0.858096	1.12171	0.827915	-0.0575157	-0.0533698	-0.00414596	NA	NA	Component of cytosolic iron-sulfur protein assembly (CIA) machinery
YOR101W	RAS1	N	Y	0.983608	0.935187	0.940876	0.995377	-0.060259	-0.0473047	-0.0129543	NA	NA	GTPase involved in G-protein signaling in adenylate cyclase activation
YDR158W	HOM2	N	Y	0.997027	0.907785	1.06253	0.940958	-0.0719364	-0.000147279	-0.0717891	NA	NA	Aspartic beta semi-aldehyde dehydrogenase
YFL049W	SWP82	N	Y	1.03554	0.864216	0.908847	0.763225	-0.0800757	-0.263855	0.183779	NA	NA	Member of the SWI/SNF chromatin remodeling complex
YIR023W	DAL81	N	Y	1.01898	0.861759	0.95692	0.902943	-0.0937594	-0.105411	0.011652	NA	NA	Positive regulator of genes in multiple nitrogen degradation pathways
YGL144C	ROG1	N	Y	0.925959	0.939897	0.997048	1.00987	-0.100203	0.00495392	-0.105157	NA	NA	Lipase with specificity for monoacylglycerol
YBR141C	BMT2	N	Y	0.861021	0.978615	0.934874	0.930194	-0.123533	-0.100776	-0.0227565	NA	NA	Nucleolar S-adenosylmethionine-dependent rRNA methyltransferase
YBR082C	UBC4	N	Y	0.975547	0.858881	1.19265	1.17533	-0.127593	0.243621	-0.371215	NA	NA	Ubiquitin-conjugating enzyme (E2)
YDR216W	ADR1	N	Y	0.959635	0.858501	1.05203	0.910093	-0.139775	-0.0313674	-0.108407	NA	NA	Carbon source-responsive zinc-finger transcription factor
YJR009C	TDH2	N	Y	0.920763	0.890658	1.05721	1.02542	-0.143078	0.0582336	-0.201311	NA	NA	Glyceraldehyde-3-phosphate dehydrogenase (GAPDH), isozyme 2
YNL022C	RCM1	N	Y	0.962833	0.834479	0.956536	0.944462	-0.157847	-0.0732724	-0.0845744	NA	NA	rRNA m5C methyltransferase
YGR233C	PHO81	N	Y	0.913993	0.872214	1.00634	1.03494	-0.163495	0.0293281	-0.192823	NA	NA	Cyclin-dependent kinase (CDK) inhibitor
YPR009W	SUT2	N	Y	0.88941	0.875737	0.90502	0.862225	-0.180255	-0.178921	-0.00133372	NA	NA	Zn2Cys6 family transcription factor
YIL156W	UBP7	N	Y	0.891794	0.861106	0.888403	0.816403	-0.190478	-0.23168	0.0412027	NA	NA	Ubiquitin-specific protease that cleaves ubiquitin-protein fusions
YLR451W	LEU3	N	Y	0.915916	0.833924	1.11806	1.05142	-0.194362	0.116671	-0.311034	NA	NA	Zinc-knuckle transcription factor, repressor and activator
YJR036C	HUL4	N	Y	0.973812	0.780969	1.01453	0.887669	-0.197474	-0.0755483	-0.121926	NA	NA	Protein with similarity to hect domain E3 ubiquitin-protein ligases
YFL001W	DEG1	N	Y	0.825699	0.92096	0.856273	0.813382	-0.197551	-0.260926	0.063375	NA	NA	tRNA:pseudouridine synthase
YHL030W	ECM29	N	Y	0.73117	0.973778	0.82344	0.910768	-0.245028	-0.207554	-0.0374744	NA	NA	Scaffold protein
YAL011W	SWC3	N	Y	0.845967	0.781873	1.06909	1.0037	-0.29816	0.0508549	-0.349015	NA	NA	Protein of unknown function
YOR061W	CKA2	N	Y	0.795511	0.810023	0.786298	0.856247	-0.317006	-0.285377	-0.0316297	NA	NA	Alpha' catalytic subunit of casein kinase 2 (CK2)
YDR156W	RPA14	N	Y	0.839551	0.757591	0.926655	0.834875	-0.326409	-0.185132	-0.141277	NA	NA	RNA polymerase I subunit A14
YDR059C	UBC5	N	Y	0.768607	0.782811	0.902192	0.862371	-0.366474	-0.181056	-0.185417	NA	NA	Ubiquitin-conjugating enzyme
YMR216C	SKY1	N	Y	NA	NA	NA	NA	NA	NA	NA	NA	NA	SR protein kinase (SRPK)
YAL022C	FUN26	N	N	NA	NA	NA	NA	NA	NA	NA	NA	NA	High affinity, broad selectivity, nucleoside/nucleobase transporter
YAL029C	MYO4	N	N	NA	NA	NA	NA	NA	NA	NA	NA	NA	Type V myosin motor involved in actin-based transport of cargos
YAL039C	CYC3	N	N	NA	NA	NA	NA	NA	NA	NA	NA	NA	Cytochrome c heme lyase (holocytochrome c synthase)
YAL053W	FLC2	N	N	NA	NA	NA	NA	NA	NA	NA	NA	NA	Putative calcium channel involved in calcium release under hypotonic
YLL010C	PSR1	N	N	NA	NA	NA	NA	NA	NA	NA	NA	NA	Plasma membrane associated protein phosphatase
YLL016W	SDC25	N	N	NA	NA	NA	NA	NA	NA	NA	NA	NA	Non-essential Ras guanine nucleotide exchange factor (GEF)
YLL028W	TPO1	N	N	NA	NA	NA	NA	NA	NA	NA	NA	NA	Polyamine transporter of the major facilitator superfamily
YLL043W	FPS1	N	N	NA	NA	NA	NA	NA	NA	NA	NA	NA	Aquaglyceroporin, plasma membrane channel
YLL061W	MMP1	N	N	NA	NA	NA	NA	NA	NA	NA	NA	NA	High-affinity S-methylmethionine permease
YLR019W	PSR2	N	N	NA	NA	NA	NA	NA	NA	NA	NA	NA	Plasma membrane phosphatase involved in the general stress response
YLR047C	FRE8	N	N	NA	NA	NA	NA	NA	NA	NA	NA	NA	Protein with sequence similarity to iron/copper reductases
YLR058C	SHM2	N	N	NA	NA	NA	NA	NA	NA	NA	NA	NA	Cytosolic serine hydroxymethyltransferase
YLR065C	ENV10	N	N	NA	NA	NA	NA	NA	NA	NA	NA	NA	Protein proposed to be involved in vacuolar functions
YLR067C	PET309	N	N	NA	NA	NA	NA	NA	NA	NA	NA	NA	Specific translational activator for the COX1 mRNA
YLR072W	LAM6	N	N	NA	NA	NA	NA	NA	NA	NA	NA	NA	Sterol transporter that transfers sterols between membranes
YLR077W	FMP25	N	N	NA	NA	NA	NA	NA	NA	NA	NA	NA	Protein required for assembly of respiratory complex III
YLR081W	GAL2	N	N	NA	NA	NA	NA	NA	NA	NA	NA	NA	Galactose permease
YLR093C	NYV1	N	N	NA	NA	NA	NA	NA	NA	NA	NA	NA	v-SNARE component of the vacuolar SNARE complex
YML013W	UBX2	N	N	NA	NA	NA	NA	NA	NA	NA	NA	NA	Bridging factor involved in ER-associated protein degradation (ERAD)
YML020W	YML020W	N	N	NA	NA	NA	NA	NA	NA	NA	NA	NA	Putative protein of unknown function
YML030W	RCF1	N	N	NA	NA	NA	NA	NA	NA	NA	NA	NA	Cytochrome c oxidase subunit
YML055W	SPC2	N	N	NA	NA	NA	NA	NA	NA	NA	NA	NA	Subunit of signal peptidase complex
YMR145C	NDE1	N	N	NA	NA	NA	NA	NA	NA	NA	NA	NA	Mitochondrial external NADH dehydrogenase
YMR157C	AIM36	N	N	NA	NA	NA	NA	NA	NA	NA	NA	NA	Protein of unknown function
YMR221C	FMP42	N	N	NA	NA	NA	NA	NA	NA	NA	NA	NA	Putative protein of unknown function
YMR231W	PEP5	N	N	NA	NA	NA	NA	NA	NA	NA	NA	NA	Histone E3 ligase, component of CORVET membrane tethering complex
YMR261C	TPS3	N	N	NA	NA	NA	NA	NA	NA	NA	NA	NA	Regulatory subunit of trehalose-6-phosphate synthase/phosphatase
YNL301C	RPL18B	N	N	NA	NA	NA	NA	NA	NA	NA	NA	NA	Ribosomal 60S subunit protein L18B
YNL305C	BXI1	N	N	NA	NA	NA	NA	NA	NA	NA	NA	NA	Protein involved in apoptosis
YNL270C	ALP1	N	N	NA	NA	NA	NA	NA	NA	NA	NA	NA	Arginine transporter
YNL271C	BNI1	N	N	NA	NA	NA	NA	NA	NA	NA	NA	NA	Formin
YOR008C	SLG1	N	N	NA	NA	NA	NA	NA	NA	NA	NA	NA	Sensor-transducer of the stress-activated PKC1-MPK1 kinase pathway
YOR016C	ERP4	N	N	NA	NA	NA	NA	NA	NA	NA	NA	NA	Member of the p24 family involved in ER to Golgi transport
YOR018W	ROD1	N	N	NA	NA	NA	NA	NA	NA	NA	NA	NA	Alpha-arrestin involved in ubiquitin-dependent endocytosis
YOR027W	STI1	N	N	NA	NA	NA	NA	NA	NA	NA	NA	NA	Hsp90 cochaperone
YOR035C	SHE4	N	N	NA	NA	NA	NA	NA	NA	NA	NA	NA	Protein containing a UCS (UNC-45/CRO1/SHE4) domain
YOR036W	PEP12	N	N	NA	NA	NA	NA	NA	NA	NA	NA	NA	Target membrane receptor (t-SNARE)
YOR079C	ATX2	N	N	NA	NA	NA	NA	NA	NA	NA	NA	NA	Golgi membrane protein involved in manganese homeostasis
YOR081C	TGL5	N	N	NA	NA	NA	NA	NA	NA	NA	NA	NA	Bifunctional triacylglycerol lipase and LPA acyltransferase
YOL003C	PFA4	N	N	NA	NA	NA	NA	NA	NA	NA	NA	NA	Palmitoyltransferase with autoacylation activity
YOL013C	HRD1	N	N	NA	NA	NA	NA	NA	NA	NA	NA	NA	Ubiquitin-protein ligase
YOL018C	TLG2	N	N	NA	NA	NA	NA	NA	NA	NA	NA	NA	Syntaxin-like t-SNARE
YOR291W	YPK9	N	N	NA	NA	NA	NA	NA	NA	NA	NA	NA	Vacuolar protein with a possible role in sequestering heavy metals
YOR297C	TIM18	N	N	NA	NA	NA	NA	NA	NA	NA	NA	NA	Component of the mitochondrial TIM22 complex
YOR334W	MRS2	N	N	NA	NA	NA	NA	NA	NA	NA	NA	NA	Mitochondrial inner membrane Mg(2+) channel
YOR347C	PYK2	N	N	NA	NA	NA	NA	NA	NA	NA	NA	NA	Pyruvate kinase
YOL027C	MDM38	N	N	NA	NA	NA	NA	NA	NA	NA	NA	NA	Mitochondrial protein
YOL029C	YOL029C	N	N	NA	NA	NA	NA	NA	NA	NA	NA	NA	Putative protein of unknown function
YOL084W	PHM7	N	N	NA	NA	NA	NA	NA	NA	NA	NA	NA	Protein of unknown function
YPL236C	ENV7	N	N	NA	NA	NA	NA	NA	NA	NA	NA	NA	Vacuolar membrane protein kinase
YPL270W	MDL2	N	N	NA	NA	NA	NA	NA	NA	NA	NA	NA	Mitochondrial inner membrane half-type ABC transporter
YPL110C	GDE1	N	N	NA	NA	NA	NA	NA	NA	NA	NA	NA	Glycerophosphocholine (GroPCho) phosphodiesterase
YPL150W	YPL150W	N	N	NA	NA	NA	NA	NA	NA	NA	NA	NA	Protein kinase of unknown cellular role
YPL159C	PET20	N	N	NA	NA	NA	NA	NA	NA	NA	NA	NA	Mitochondrial protein
YPL222W	FMP40	N	N	NA	NA	NA	NA	NA	NA	NA	NA	NA	Putative protein of unknown function
YBR187W	GDT1	N	N	NA	NA	NA	NA	NA	NA	NA	NA	NA	Protein of unknown function involved in calcium homeostasis
YBR199W	KTR4	N	N	NA	NA	NA	NA	NA	NA	NA	NA	NA	Glycosyltransferase involved in protein glycosylation
YBR208C	DUR1,2	N	N	NA	NA	NA	NA	NA	NA	NA	NA	NA	Urea amidolyase
YBR217W	ATG12	N	N	NA	NA	NA	NA	NA	NA	NA	NA	NA	Ubiquitin-like modifier involved in autophagy and the Cvt pathway
YBR218C	PYC2	N	N	NA	NA	NA	NA	NA	NA	NA	NA	NA	Pyruvate carboxylase isoform
YBR255W	MTC4	N	N	NA	NA	NA	NA	NA	NA	NA	NA	NA	Protein of unknown function
YBR262C	MIC12	N	N	NA	NA	NA	NA	NA	NA	NA	NA	NA	Component of the MICOS complex
YDR122W	KIN1	N	N	NA	NA	NA	NA	NA	NA	NA	NA	NA	Serine/threonine protein kinase involved in regulation of exocytosis
YDR144C	MKC7	N	N	NA	NA	NA	NA	NA	NA	NA	NA	NA	GPI-anchored aspartyl protease
YDR406W	PDR15	N	N	NA	NA	NA	NA	NA	NA	NA	NA	NA	Plasma membrane ATP binding cassette (ABC) transporter
YEL010W	YEL010W	N	N	NA	NA	NA	NA	NA	NA	NA	NA	NA	Dubious open reading frame
YEL027W	VMA3	N	N	NA	NA	NA	NA	NA	NA	NA	NA	NA	Proteolipid subunit c of the V0 domain of vacuolar H(+)-ATPase
YEL067C	YEL067C	N	N	NA	NA	NA	NA	NA	NA	NA	NA	NA	Putative protein of unknown function
YER005W	YND1	N	N	NA	NA	NA	NA	NA	NA	NA	NA	NA	Apyrase with wide substrate specificity
YER020W	GPA2	N	N	NA	NA	NA	NA	NA	NA	NA	NA	NA	Nucleotide binding alpha subunit of the heterotrimeric G protein
YER032W	FIR1	N	N	NA	NA	NA	NA	NA	NA	NA	NA	NA	Protein involved in 3' mRNA processing
YER047C	SAP1	N	N	NA	NA	NA	NA	NA	NA	NA	NA	NA	Putative ATPase of the AAA family
YER085C	YER085C	N	N	NA	NA	NA	NA	NA	NA	NA	NA	NA	Putative protein of unknown function
YGR130C	YGR130C	N	N	NA	NA	NA	NA	NA	NA	NA	NA	NA	Component of the eisosome with unknown function
YGR183C	QCR9	N	N	NA	NA	NA	NA	NA	NA	NA	NA	NA	Subunit 9 of ubiquinol cytochrome-c reductase (Complex III)
YGR189C	CRH1	N	N	NA	NA	NA	NA	NA	NA	NA	NA	NA	Chitin transglycosylase
YHL021C	AIM17	N	N	NA	NA	NA	NA	NA	NA	NA	NA	NA	Protein of unknown function
YHL038C	CBP2	N	N	NA	NA	NA	NA	NA	NA	NA	NA	NA	Required for splicing of the group I intron bI5 of the COB pre-mRNA
YHL043W	ECM34	N	N	NA	NA	NA	NA	NA	NA	NA	NA	NA	Protein of unknown function
YHR050W	SMF2	N	N	NA	NA	NA	NA	NA	NA	NA	NA	NA	Divalent metal ion transporter involved in manganese homeostasis
YHR073W	OSH3	N	N	NA	NA	NA	NA	NA	NA	NA	NA	NA	Member of an oxysterol-binding protein family
YHR075C	PPE1	N	N	NA	NA	NA	NA	NA	NA	NA	NA	NA	Protein with carboxyl methyl esterase activity
YHR078W	YHR078W	N	N	NA	NA	NA	NA	NA	NA	NA	NA	NA	High osmolarity-regulated gene of unknown function
YHR092C	HXT4	N	N	NA	NA	NA	NA	NA	NA	NA	NA	NA	High-affinity glucose transporter
YHR155W	LAM1	N	N	NA	NA	NA	NA	NA	NA	NA	NA	NA	Putative sterol transfer protein
YHR199C	AIM46	N	N	NA	NA	NA	NA	NA	NA	NA	NA	NA	Protein of unknown function
YLR130C	ZRT2	N	N	NA	NA	NA	NA	NA	NA	NA	NA	NA	Low-affinity zinc transporter of the plasma membrane
YLR149C	YLR149C	N	N	NA	NA	NA	NA	NA	NA	NA	NA	NA	Protein of unknown function
YLR177W	YLR177W	N	N	NA	NA	NA	NA	NA	NA	NA	NA	NA	Putative protein of unknown function
YLR189C	ATG26	N	N	NA	NA	NA	NA	NA	NA	NA	NA	NA	UDP-glucose:sterol glucosyltransferase
YLR191W	PEX13	N	N	NA	NA	NA	NA	NA	NA	NA	NA	NA	Peroxisomal importomer complex component
YLR199C	PBA1	N	N	NA	NA	NA	NA	NA	NA	NA	NA	NA	Protein involved in 20S proteasome assembly
YLR225C	YLR225C	N	N	NA	NA	NA	NA	NA	NA	NA	NA	NA	Putative protein of unknown function
YKL064W	MNR2	N	N	NA	NA	NA	NA	NA	NA	NA	NA	NA	Vacuolar membrane protein required for magnesium homeostasis
YKL075C	YKL075C	N	N	NA	NA	NA	NA	NA	NA	NA	NA	NA	Putative protein of unknown function
YKL087C	CYT2	N	N	NA	NA	NA	NA	NA	NA	NA	NA	NA	Cytochrome c1 heme lyase
YKL092C	BUD2	N	N	NA	NA	NA	NA	NA	NA	NA	NA	NA	GTPase activating factor for Rsr1p/Bud1p
YKL119C	VPH2	N	N	NA	NA	NA	NA	NA	NA	NA	NA	NA	Integral membrane protein required for V-ATPase function
YKL132C	RMA1	N	N	NA	NA	NA	NA	NA	NA	NA	NA	NA	Putative dihydrofolate synthetase
YKL146W	AVT3	N	N	NA	NA	NA	NA	NA	NA	NA	NA	NA	Vacuolar transporter
YKL175W	ZRT3	N	N	NA	NA	NA	NA	NA	NA	NA	NA	NA	Vacuolar membrane zinc transporter
YKL179C	COY1	N	N	NA	NA	NA	NA	NA	NA	NA	NA	NA	Golgi membrane protein with similarity to mammalian CASP
YGR033C	TIM21	N	N	NA	NA	NA	NA	NA	NA	NA	NA	NA	Nonessential component of the TIM23 complex
YGR036C	CAX4	N	N	NA	NA	NA	NA	NA	NA	NA	NA	NA	Dolichyl pyrophosphate (Dol-P-P) phosphatase
YGR097W	ASK10	N	N	NA	NA	NA	NA	NA	NA	NA	NA	NA	Regulator of the Fps1p glycerol channel
YGR100W	MDR1	N	N	NA	NA	NA	NA	NA	NA	NA	NA	NA	Cytoplasmic GTPase-activating protein
YOR099W	KTR1	N	N	NA	NA	NA	NA	NA	NA	NA	NA	NA	Alpha-1,2-mannosyltransferase
YOR106W	VAM3	N	N	NA	NA	NA	NA	NA	NA	NA	NA	NA	Syntaxin-like vacuolar t-SNARE
YOR155C	ISN1	N	N	NA	NA	NA	NA	NA	NA	NA	NA	NA	Inosine 5'-monophosphate (IMP)-specific 5'-nucleotidase
YOR190W	SPR1	N	N	NA	NA	NA	NA	NA	NA	NA	NA	NA	Sporulation-specific exo-1,3-beta-glucanase
YOR231W	MKK1	N	N	NA	NA	NA	NA	NA	NA	NA	NA	NA	MAPKK involved in the protein kinase C signaling pathway
YOR245C	DGA1	N	N	NA	NA	NA	NA	NA	NA	NA	NA	NA	Diacylglycerol acyltransferase
YJL129C	TRK1	N	N	NA	NA	NA	NA	NA	NA	NA	NA	NA	Component of the Trk1p-Trk2p potassium transport system
YJL178C	ATG27	N	N	NA	NA	NA	NA	NA	NA	NA	NA	NA	Type I membrane protein involved in autophagy and the Cvt pathway
YJL214W	HXT8	N	N	NA	NA	NA	NA	NA	NA	NA	NA	NA	Protein of unknown function with similarity to hexose transporters
YLR332W	MID2	N	N	NA	NA	NA	NA	NA	NA	NA	NA	NA	O-glycosylated plasma membrane protein
YLR350W	ORM2	N	N	NA	NA	NA	NA	NA	NA	NA	NA	NA	Protein that mediates sphingolipid homeostasis
YLR362W	STE11	N	N	NA	NA	NA	NA	NA	NA	NA	NA	NA	Signal transducing MEK kinase
YLR386W	VAC14	N	N	NA	NA	NA	NA	NA	NA	NA	NA	NA	Enzyme regulator
YLR413W	INA1	N	N	NA	NA	NA	NA	NA	NA	NA	NA	NA	Protein of unknown function
YDR147W	EKI1	N	N	NA	NA	NA	NA	NA	NA	NA	NA	NA	Ethanolamine kinase
YDR148C	KGD2	N	N	NA	NA	NA	NA	NA	NA	NA	NA	NA	Dihydrolipoyl transsuccinylase
YGL210W	YPT32	N	N	NA	NA	NA	NA	NA	NA	NA	NA	NA	Rab family GTPase involved in the exocytic pathway
YGL212W	VAM7	N	N	NA	NA	NA	NA	NA	NA	NA	NA	NA	Vacuolar SNARE protein
YGR001C	EFM5	N	N	NA	NA	NA	NA	NA	NA	NA	NA	NA	S-adenosylmethionine-dependent lysine methyltransferase
YPL053C	KTR6	N	N	NA	NA	NA	NA	NA	NA	NA	NA	NA	Probable mannosylphosphate transferase
YPL058C	PDR12	N	N	NA	NA	NA	NA	NA	NA	NA	NA	NA	Plasma membrane ATP-binding cassette (ABC) transporter
YPR109W	YPR109W	N	N	NA	NA	NA	NA	NA	NA	NA	NA	NA	Predicted membrane protein
YPR122W	AXL1	N	N	NA	NA	NA	NA	NA	NA	NA	NA	NA	Haploid specific endoprotease of a-factor mating pheromone
YPR125W	YLH47	N	N	NA	NA	NA	NA	NA	NA	NA	NA	NA	Mitochondrial inner membrane protein
YPR129W	SCD6	N	N	NA	NA	NA	NA	NA	NA	NA	NA	NA	Repressor of translation initiation
YDR538W	PAD1	N	N	NA	NA	NA	NA	NA	NA	NA	NA	NA	Phenylacrylic acid decarboxylase
YGR227W	DIE2	N	N	NA	NA	NA	NA	NA	NA	NA	NA	NA	Dolichyl-phosphoglucose-dependent alpha-1,2-glucosyltransferase
YGR235C	MIC26	N	N	NA	NA	NA	NA	NA	NA	NA	NA	NA	Component of the MICOS complex
YGR243W	MPC3	N	N	NA	NA	NA	NA	NA	NA	NA	NA	NA	Highly conserved subunit of the mitochondrial pyruvate carrier (MPC)
YBL011W	SCT1	N	N	NA	NA	NA	NA	NA	NA	NA	NA	NA	Glycerol 3-phosphate/dihydroxyacetone phosphate sn-1 acyltransferase
YBL085W	BOI1	N	N	NA	NA	NA	NA	NA	NA	NA	NA	NA	Protein implicated in polar growth
YBL087C	RPL23A	N	N	NA	NA	NA	NA	NA	NA	NA	NA	NA	Ribosomal 60S subunit protein L23A
YGL002W	ERP6	N	N	NA	NA	NA	NA	NA	NA	NA	NA	NA	Member of the p24 family involved in ER to Golgi transport
YGL051W	MST27	N	N	NA	NA	NA	NA	NA	NA	NA	NA	NA	Putative integral membrane protein, involved in vesicle formation
YGL060W	YBP2	N	N	NA	NA	NA	NA	NA	NA	NA	NA	NA	Central kinetochore associated protein
YGL062W	PYC1	N	N	NA	NA	NA	NA	NA	NA	NA	NA	NA	Pyruvate carboxylase isoform
YNL214W	PEX17	N	N	NA	NA	NA	NA	NA	NA	NA	NA	NA	Membrane peroxin of the peroxisomal importomer complex
YNL237W	YTP1	N	N	NA	NA	NA	NA	NA	NA	NA	NA	NA	Probable type-III integral membrane protein of unknown function
YKL207W	EMC3	N	N	NA	NA	NA	NA	NA	NA	NA	NA	NA	Member of conserved ER transmembrane complex
YKR049C	FMP46	N	N	NA	NA	NA	NA	NA	NA	NA	NA	NA	Putative redox protein containing a thioredoxin fold
YDR261C	EXG2	N	N	NA	NA	NA	NA	NA	NA	NA	NA	NA	Exo-1,3-beta-glucanase
YDR270W	CCC2	N	N	NA	NA	NA	NA	NA	NA	NA	NA	NA	Cu(+2)-transporting P-type ATPase
YDR313C	PIB1	N	N	NA	NA	NA	NA	NA	NA	NA	NA	NA	RING-type ubiquitin ligase of the endosomal and vacuolar membranes
YDR316W	OMS1	N	N	NA	NA	NA	NA	NA	NA	NA	NA	NA	Protein integral to the mitochondrial membrane
YIL012W	YIL012W	N	N	NA	NA	NA	NA	NA	NA	NA	NA	NA	#N/A
YIL014W	MNT3	N	N	NA	NA	NA	NA	NA	NA	NA	NA	NA	Alpha-1,3-mannosyltransferase
YIL028W	YIL028W	N	N	NA	NA	NA	NA	NA	NA	NA	NA	NA	Dubious open reading frame
YFL025C	BST1	N	N	NA	NA	NA	NA	NA	NA	NA	NA	NA	GPI inositol deacylase of the endoplasmic reticulum (ER)
YGR260W	TNA1	N	N	NA	NA	NA	NA	NA	NA	NA	NA	NA	High affinity nicotinic acid plasma membrane permease
YGR263C	SAY1	N	N	NA	NA	NA	NA	NA	NA	NA	NA	NA	Sterol deacetylase
YIL070C	MAM33	N	N	NA	NA	NA	NA	NA	NA	NA	NA	NA	Specific translational activator for the mitochondrial COX1 mRNA
YIL077C	YIL077C	N	N	NA	NA	NA	NA	NA	NA	NA	NA	NA	Putative protein of unknown function
YIL087C	AIM19	N	N	NA	NA	NA	NA	NA	NA	NA	NA	NA	Protein of unknown function
YIL090W	ICE2	N	N	NA	NA	NA	NA	NA	NA	NA	NA	NA	Integral ER membrane protein with type-III transmembrane domains
YIL095W	PRK1	N	N	NA	NA	NA	NA	NA	NA	NA	NA	NA	Protein serine/threonine kinase
YGR282C	BGL2	N	N	NA	NA	NA	NA	NA	NA	NA	NA	NA	Endo-beta-1,3-glucanase
YKR084C	HBS1	N	N	NA	NA	NA	NA	NA	NA	NA	NA	NA	GTPase with similarity to translation release factors
YOL088C	MPD2	N	N	NA	NA	NA	NA	NA	NA	NA	NA	NA	Member of the protein disulfide isomerase (PDI) family
YHR045W	YHR045W	N	N	NA	NA	NA	NA	NA	NA	NA	NA	NA	Putative protein of unknown function
YHR162W	MPC2	N	N	NA	NA	NA	NA	NA	NA	NA	NA	NA	Highly conserved subunit of the mitochondrial pyruvate carrier (MPC)
YLR030W	YLR030W	N	N	NA	NA	NA	NA	NA	NA	NA	NA	NA	Putative protein of unknown function
YMR313C	TGL3	N	N	NA	NA	NA	NA	NA	NA	NA	NA	NA	Bifunctional triacylglycerol lipase and LPE acyltransferase
YOL112W	MSB4	N	N	NA	NA	NA	NA	NA	NA	NA	NA	NA	GTPase-activating protein of the Ras superfamily
YML128C	MSC1	N	N	NA	NA	NA	NA	NA	NA	NA	NA	NA	Protein of unknown function
YMR095C	SNO1	N	N	NA	NA	NA	NA	NA	NA	NA	NA	NA	Protein of unconfirmed function
YMR115W	MGR3	N	N	NA	NA	NA	NA	NA	NA	NA	NA	NA	Subunit of the mitochondrial (mt) i-AAA protease supercomplex
YPR028W	YOP1	N	N	NA	NA	NA	NA	NA	NA	NA	NA	NA	Reticulon-interacting protein
YJL057C	IKS1	N	N	NA	NA	NA	NA	NA	NA	NA	NA	NA	Protein kinase of unknown cellular role
YJL062W	LAS21	N	N	NA	NA	NA	NA	NA	NA	NA	NA	NA	Integral plasma membrane protein
YJL063C	MRPL8	N	N	NA	NA	NA	NA	NA	NA	NA	NA	NA	Mitochondrial ribosomal protein of the large subunit
YJL095W	BCK1	N	N	NA	NA	NA	NA	NA	NA	NA	NA	NA	MAPKKK acting in the protein kinase C signaling pathway
YJL100W	LSB6	N	N	NA	NA	NA	NA	NA	NA	NA	NA	NA	Type II phosphatidylinositol 4-kinase
YPR047W	MSF1	N	N	NA	NA	NA	NA	NA	NA	NA	NA	NA	Mitochondrial phenylalanyl-tRNA synthetase
YER031C	YPT31	N	N	NA	NA	NA	NA	NA	NA	NA	NA	NA	Rab family GTPase
YJL052W	TDH1	N	N	NA	NA	NA	NA	NA	NA	NA	NA	NA	Glyceraldehyde-3-phosphate dehydrogenase (GAPDH), isozyme 1
YKR087C	OMA1	N	N	NA	NA	NA	NA	NA	NA	NA	NA	NA	Metalloendopeptidase of the mitochondrial inner membrane
YKR103W	NFT1	N	N	NA	NA	NA	NA	NA	NA	NA	NA	NA	Putative transporter of the MRP subfamily
YOL158C	ENB1	N	N	NA	NA	NA	NA	NA	NA	NA	NA	NA	Endosomal ferric enterobactin transporter
YCL038C	ATG22	N	N	NA	NA	NA	NA	NA	NA	NA	NA	NA	Vacuolar integral membrane protein required for efflux of amino acids
YJR080C	AIM24	N	N	NA	NA	NA	NA	NA	NA	NA	NA	NA	Protein with a role in determining mitochondrial architecture
YLR446W	YLR446W	N	N	NA	NA	NA	NA	NA	NA	NA	NA	NA	Putative hexokinase
YLR447C	VMA6	N	N	NA	NA	NA	NA	NA	NA	NA	NA	NA	Subunit d of the V0 integral membrane domain of V-ATPase
YLR454W	FMP27	N	N	NA	NA	NA	NA	NA	NA	NA	NA	NA	Putative protein of unknown function
YMR060C	SAM37	N	N	NA	NA	NA	NA	NA	NA	NA	NA	NA	Component of the Sorting and Assembly Machinery (SAM) complex
YNR051C	BRE5	N	N	NA	NA	NA	NA	NA	NA	NA	NA	NA	Ubiquitin protease cofactor
YDL218W	YDL218W	N	N	NA	NA	NA	NA	NA	NA	NA	NA	NA	Putative protein of unknown function
YJR100C	AIM25	N	N	NA	NA	NA	NA	NA	NA	NA	NA	NA	Protein of unknown function
YBR295W	PCA1	N	N	NA	NA	NA	NA	NA	NA	NA	NA	NA	Cadmium transporting P-type ATPase
YDR046C	BAP3	N	N	NA	NA	NA	NA	NA	NA	NA	NA	NA	Amino acid permease
YDL123W	SNA4	N	N	NA	NA	NA	NA	NA	NA	NA	NA	NA	Protein of unknown function
YDL181W	INH1	N	N	NA	NA	NA	NA	NA	NA	NA	NA	NA	Protein that inhibits ATP hydrolysis by the F1F0-ATP synthase
YBL098W	BNA4	N	N	NA	NA	NA	NA	NA	NA	NA	NA	NA	Kynurenine 3-monooxygenase
YBR005W	RCR1	N	N	NA	NA	NA	NA	NA	NA	NA	NA	NA	Protein of the ER membrane involved in cell wall chitin deposition
YBR006W	UGA2	N	N	NA	NA	NA	NA	NA	NA	NA	NA	NA	Succinate semialdehyde dehydrogenase
YNL041C	COG6	N	N	NA	NA	NA	NA	NA	NA	NA	NA	NA	Component of the conserved oligomeric Golgi complex
YNR028W	CPR8	N	N	NA	NA	NA	NA	NA	NA	NA	NA	NA	Peptidyl-prolyl cis-trans isomerase (cyclophilin)
YBR023C	CHS3	N	N	NA	NA	NA	NA	NA	NA	NA	NA	NA	Chitin synthase III
YBR024W	SCO2	N	N	NA	NA	NA	NA	NA	NA	NA	NA	NA	Protein anchored to mitochondrial inner membrane
YBR036C	CSG2	N	N	NA	NA	NA	NA	NA	NA	NA	NA	NA	Endoplasmic reticulum membrane protein
YBR041W	FAT1	N	N	NA	NA	NA	NA	NA	NA	NA	NA	NA	Very long chain fatty acyl-CoA synthetase and fatty acid transporter
YBR044C	TCM62	N	N	NA	NA	NA	NA	NA	NA	NA	NA	NA	Protein involved in assembly of the succinate dehydrogenase complex
YBR048W	RPS11B	N	N	NA	NA	NA	NA	NA	NA	NA	NA	NA	Protein component of the small (40S) ribosomal subunit
YBR054W	YRO2	N	N	NA	NA	NA	NA	NA	NA	NA	NA	NA	Protein with a putative role in response to acid stress
YBR061C	TRM7	N	N	NA	NA	NA	NA	NA	NA	NA	NA	NA	2'-O-ribose methyltransferase
YBR077C	SLM4	N	N	NA	NA	NA	NA	NA	NA	NA	NA	NA	Component of the EGO and GSE complexes
YNL054W	VAC7	N	N	NA	NA	NA	NA	NA	NA	NA	NA	NA	Integral vacuolar membrane protein
YNL063W	MTQ1	N	N	NA	NA	NA	NA	NA	NA	NA	NA	NA	S-adenosylmethionine-dependent methyltransferase
YIL125W	KGD1	N	N	NA	NA	NA	NA	NA	NA	NA	NA	NA	Subunit of the mitochondrial alpha-ketoglutarate dehydrogenase complex
YIL137C	TMA108	N	N	NA	NA	NA	NA	NA	NA	NA	NA	NA	Ribosome-associated protein that is involved in ribosome biogenesis
YIL159W	BNR1	N	N	NA	NA	NA	NA	NA	NA	NA	NA	NA	Formin
YIR003W	AIM21	N	N	NA	NA	NA	NA	NA	NA	NA	NA	NA	Protein of unknown function
YNL080C	EOS1	N	N	NA	NA	NA	NA	NA	NA	NA	NA	NA	Protein involved in N-glycosylation
YNL106C	INP52	N	N	NA	NA	NA	NA	NA	NA	NA	NA	NA	Polyphosphatidylinositol phosphatase
YCR032W	BPH1	N	N	NA	NA	NA	NA	NA	NA	NA	NA	NA	Protein homologous to Chediak-Higashi syndrome and Beige proteins
YCR075C	ERS1	N	N	NA	NA	NA	NA	NA	NA	NA	NA	NA	Protein with similarity to human cystinosin
YGR155W	CYS4	N	N	NA	NA	NA	NA	NA	NA	NA	NA	NA	Cystathionine beta-synthase
YLR361C	DCR2	N	N	NA	NA	NA	NA	NA	NA	NA	NA	NA	Phosphoesterase
YLR382C	NAM2	N	N	NA	NA	NA	NA	NA	NA	NA	NA	NA	Mitochondrial leucyl-tRNA synthetase
YNL142W	MEP2	N	N	NA	NA	NA	NA	NA	NA	NA	NA	NA	Ammonium permease involved in regulation of pseudohyphal growth
YBR085W	AAC3	N	N	NA	NA	NA	NA	NA	NA	NA	NA	NA	Mitochondrial inner membrane ADP/ATP translocator
YFL042C	LAM5	N	N	NA	NA	NA	NA	NA	NA	NA	NA	NA	Putative sterol transfer protein
YHR171W	ATG7	N	N	NA	NA	NA	NA	NA	NA	NA	NA	NA	Autophagy-related protein and dual specificity member of the E1 family
YJL101C	GSH1	N	N	NA	NA	NA	NA	NA	NA	NA	NA	NA	Gamma glutamylcysteine synthetase
YML066C	SMA2	N	N	NA	NA	NA	NA	NA	NA	NA	NA	NA	Meiosis-specific prospore membrane protein
YML115C	VAN1	N	N	NA	NA	NA	NA	NA	NA	NA	NA	NA	Component of the mannan polymerase I
YPL036W	PMA2	N	N	NA	NA	NA	NA	NA	NA	NA	NA	NA	Plasma membrane H+-ATPase
YBR127C	VMA2	N	N	NA	NA	NA	NA	NA	NA	NA	NA	NA	Subunit B of V1 peripheral membrane domain of vacuolar H+-ATPase
YBR161W	CSH1	N	N	NA	NA	NA	NA	NA	NA	NA	NA	NA	Mannosylinositol phosphorylceramide (MIPC) synthase catalytic subunit
YDL010W	GRX6	N	N	NA	NA	NA	NA	NA	NA	NA	NA	NA	Cis-golgi localized monothiol glutaredoxin, binds Fe-S cluster
YDL093W	PMT5	N	N	NA	NA	NA	NA	NA	NA	NA	NA	NA	Protein O-mannosyltransferase
YDR456W	NHX1	N	N	NA	NA	NA	NA	NA	NA	NA	NA	NA	Na+/H+ and K+/H+ exchanger
YDR491C	YDR491C	N	N	NA	NA	NA	NA	NA	NA	NA	NA	NA	Dubious open reading frame
YDR503C	LPP1	N	N	NA	NA	NA	NA	NA	NA	NA	NA	NA	Lipid phosphate phosphatase
YDR511W	SDH7	N	N	NA	NA	NA	NA	NA	NA	NA	NA	NA	Mitochondrial protein involved in assembly of succinate dehydrogenase
YGL105W	ARC1	N	N	NA	NA	NA	NA	NA	NA	NA	NA	NA	Protein that binds tRNA and methionyl- and glutamyl-tRNA synthetases
YGL107C	RMD9	N	N	NA	NA	NA	NA	NA	NA	NA	NA	NA	Mitochondrial protein required for respiratory growth
YER118C	SHO1	N	N	NA	NA	NA	NA	NA	NA	NA	NA	NA	Transmembrane osmosensor for filamentous growth and HOG pathways
YER131W	RPS26B	N	N	NA	NA	NA	NA	NA	NA	NA	NA	NA	Protein component of the small (40S) ribosomal subunit
YER155C	BEM2	N	N	NA	NA	NA	NA	NA	NA	NA	NA	NA	Rho GTPase activating protein (RhoGAP)
YGL140C	YGL140C	N	N	NA	NA	NA	NA	NA	NA	NA	NA	NA	Putative protein of unknown function
YGL153W	PEX14	N	N	NA	NA	NA	NA	NA	NA	NA	NA	NA	Central component of the peroxisomal importomer complex
YER175C	TMT1	N	N	NA	NA	NA	NA	NA	NA	NA	NA	NA	Trans-aconitate methyltransferase
YBR035C	PDX3	N	N	NA	NA	NA	NA	NA	NA	NA	NA	NA	Pyridoxine (pyridoxamine) phosphate oxidase
YCR044C	PER1	N	N	NA	NA	NA	NA	NA	NA	NA	NA	NA	Protein of the endoplasmic reticulum
YGR222W	PET54	N	N	NA	NA	NA	NA	NA	NA	NA	NA	NA	Mitochondrial inner membrane protein
YML110C	COQ5	N	N	NA	NA	NA	NA	NA	NA	NA	NA	NA	2-hexaprenyl-6-methoxy-1,4-benzoquinone methyltransferase
YML129C	COX14	N	N	NA	NA	NA	NA	NA	NA	NA	NA	NA	Mitochondrial cytochrome c oxidase (complex IV) assembly factor
YGR255C	COQ6	N	N	NA	NA	NA	NA	NA	NA	NA	NA	NA	Flavin-dependent monooxygenase involved in ubiquinone biosynthesis
YLR148W	PEP3	N	N	NA	NA	NA	NA	NA	NA	NA	NA	NA	Component of CORVET membrane tethering complex
YAL025C	MAK16	Y	Y	NA	NA	NA	NA	NA	NA	NA	NA	NA	Essential nuclear protein
YLR008C	PAM18	Y	N	NA	NA	NA	NA	NA	NA	NA	NA	NA	Subunit of the import motor (PAM complex)
YLR071C	RGR1	Y	Y	NA	NA	NA	NA	NA	NA	NA	NA	NA	Subunit of the RNA polymerase II mediator complex
YMR260C	TIF11	Y	N	NA	NA	NA	NA	NA	NA	NA	NA	NA	Translation initiation factor eIF1A
YMR301C	ATM1	Y	N	NA	NA	NA	NA	NA	NA	NA	NA	NA	Mitochondrial inner membrane ATP-binding cassette (ABC) transporter
YBR237W	PRP5	Y	Y	NA	NA	NA	NA	NA	NA	NA	NA	NA	RNA helicase in the DEAD-box family
YDR060W	MAK21	Y	Y	NA	NA	NA	NA	NA	NA	NA	NA	NA	Constituent of 66S pre-ribosomal particles
YOL022C	TSR4	Y	N	NA	NA	NA	NA	NA	NA	NA	NA	NA	Cytoplasmic protein required for correct processing of 20S pre-rRNA
YOR063W	RPL3	Y	N	NA	NA	NA	NA	NA	NA	NA	NA	NA	Ribosomal 60S subunit protein L3
YOR075W	UFE1	Y	N	NA	NA	NA	NA	NA	NA	NA	NA	NA	t-SNARE protein required for retrograde vesicular traffic
YOR341W	RPA190	Y	Y	NA	NA	NA	NA	NA	NA	NA	NA	NA	RNA polymerase I largest subunit A190
YPL235W	RVB2	Y	Y	NA	NA	NA	NA	NA	NA	NA	NA	NA	ATP-dependent DNA helicase, also known as reptin
YDR362C	TFC6	Y	Y	NA	NA	NA	NA	NA	NA	NA	NA	NA	Subunit of RNA polymerase III transcription initiation factor complex
YER025W	GCD11	Y	N	NA	NA	NA	NA	NA	NA	NA	NA	NA	Gamma subunit of the translation initiation factor eIF2
YHR036W	BRL1	Y	Y	NA	NA	NA	NA	NA	NA	NA	NA	NA	Essential nuclear envelope/ER integral membrane protein
YHR101C	BIG1	Y	N	NA	NA	NA	NA	NA	NA	NA	NA	NA	Integral membrane protein of the endoplasmic reticulum
YCL052C	PBN1	Y	N	NA	NA	NA	NA	NA	NA	NA	NA	NA	Component of glycosylphosphatidylinositol-mannosyltransferase I
YGR091W	PRP31	Y	Y	NA	NA	NA	NA	NA	NA	NA	NA	NA	Splicing factor
YKL012W	PRP40	Y	Y	NA	NA	NA	NA	NA	NA	NA	NA	NA	U1 snRNP protein involved in splicing
YKL033W	TTI1	Y	Y	NA	NA	NA	NA	NA	NA	NA	NA	NA	Subunit of the ASTRA complex, involved in chromatin remodeling
YKL154W	SRP102	Y	N	NA	NA	NA	NA	NA	NA	NA	NA	NA	Signal recognition particle (SRP) receptor beta subunit
YKL173W	SNU114	Y	Y	NA	NA	NA	NA	NA	NA	NA	NA	NA	GTPase component of U5 snRNP involved in mRNA splicing via spliceosome
YLR129W	DIP2	Y	Y	NA	NA	NA	NA	NA	NA	NA	NA	NA	Nucleolar protein
YLR175W	CBF5	Y	Y	NA	NA	NA	NA	NA	NA	NA	NA	NA	Pseudouridine synthase catalytic subunit of box H/ACA snoRNPs
YLR222C	UTP13	Y	Y	NA	NA	NA	NA	NA	NA	NA	NA	NA	Nucleolar protein
YGR099W	TEL2	Y	Y	NA	NA	NA	NA	NA	NA	NA	NA	NA	Subunit of the ASTRA complex, involved in chromatin remodeling
YJL081C	ARP4	Y	Y	NA	NA	NA	NA	NA	NA	NA	NA	NA	Nuclear actin-related protein involved in chromatin remodeling
YLR243W	GPN3	Y	N	NA	NA	NA	NA	NA	NA	NA	NA	NA	Putative GTPase with a role in biogenesis of RNA pol II and polIII
YLR291C	GCD7	Y	N	NA	NA	NA	NA	NA	NA	NA	NA	NA	Beta subunit of the translation initiation factor eIF2B
YLR305C	STT4	Y	N	NA	NA	NA	NA	NA	NA	NA	NA	NA	Phosphatidylinositol-4-kinase
YLR323C	CWC24	Y	Y	NA	NA	NA	NA	NA	NA	NA	NA	NA	General splicing factor
YLR336C	SGD1	Y	Y	NA	NA	NA	NA	NA	NA	NA	NA	NA	Essential nuclear protein
YOR174W	MED4	Y	Y	NA	NA	NA	NA	NA	NA	NA	NA	NA	Subunit of the RNA polymerase II mediator complex
YOR250C	CLP1	Y	Y	NA	NA	NA	NA	NA	NA	NA	NA	NA	Component of the cleavage and polyadenylation factor I (CF I)
YOR259C	RPT4	Y	Y	NA	NA	NA	NA	NA	NA	NA	NA	NA	ATPase of the 19S regulatory particle of the 26S proteasome
YBL026W	LSM2	Y	Y	NA	NA	NA	NA	NA	NA	NA	NA	NA	Lsm (Like Sm) protein
YDR168W	CDC37	Y	N	NA	NA	NA	NA	NA	NA	NA	NA	NA	Essential Hsp90p co-chaperone
YDR236C	FMN1	Y	N	NA	NA	NA	NA	NA	NA	NA	NA	NA	Riboflavin kinase, produces riboflavin monophosphate (FMN)
YFR042W	KEG1	Y	N	NA	NA	NA	NA	NA	NA	NA	NA	NA	Integral membrane protein of the ER
YGL238W	CSE1	Y	Y	NA	NA	NA	NA	NA	NA	NA	NA	NA	Nuclear envelope protein that acts as a recycling factor
YGL245W	GUS1	Y	N	NA	NA	NA	NA	NA	NA	NA	NA	NA	Glutamyl-tRNA synthetase (GluRS)
YGR009C	SEC9	Y	N	NA	NA	NA	NA	NA	NA	NA	NA	NA	t-SNARE protein required for secretory vesicle-plasma membrane fusion
YGR246C	BRF1	Y	Y	NA	NA	NA	NA	NA	NA	NA	NA	NA	TFIIIB B-related factor
YPL020C	ULP1	Y	Y	NA	NA	NA	NA	NA	NA	NA	NA	NA	Protease that specifically cleaves Smt3p protein conjugates
YPR112C	MRD1	Y	Y	NA	NA	NA	NA	NA	NA	NA	NA	NA	Essential conserved small ribosomal subunit (40s) synthesis factor
YPR133C	SPN1	Y	Y	NA	NA	NA	NA	NA	NA	NA	NA	NA	Protein involved in RNA polymerase II transcription
YPR143W	RRP15	Y	Y	NA	NA	NA	NA	NA	NA	NA	NA	NA	Nucleolar protein
YBL030C	PET9	Y	N	NA	NA	NA	NA	NA	NA	NA	NA	NA	Major ADP/ATP carrier of the mitochondrial inner membrane
YBL034C	STU1	Y	Y	NA	NA	NA	NA	NA	NA	NA	NA	NA	Component of the mitotic spindle
YDR243C	PRP28	Y	Y	NA	NA	NA	NA	NA	NA	NA	NA	NA	RNA binding protein
YDR301W	CFT1	Y	Y	NA	NA	NA	NA	NA	NA	NA	NA	NA	RNA-binding subunit of the mRNA cleavage and polyadenylation factor
YDR325W	YCG1	Y	Y	NA	NA	NA	NA	NA	NA	NA	NA	NA	Subunit of the condensin complex
YDR328C	SKP1	Y	Y	NA	NA	NA	NA	NA	NA	NA	NA	NA	Evolutionarily conserved kinetochore protein
YGL008C	PMA1	Y	N	NA	NA	NA	NA	NA	NA	NA	NA	NA	Plasma membrane P2-type H+-ATPase
YGL022W	STT3	Y	N	NA	NA	NA	NA	NA	NA	NA	NA	NA	Subunit of the oligosaccharyltransferase complex of the ER lumen
YGL055W	OLE1	Y	N	NA	NA	NA	NA	NA	NA	NA	NA	NA	Delta(9) fatty acid desaturase
YIL068C	SEC6	Y	N	NA	NA	NA	NA	NA	NA	NA	NA	NA	Essential 88kDa subunit of the exocyst complex
YNL161W	CBK1	Y	Y	NA	NA	NA	NA	NA	NA	NA	NA	NA	Serine/threonine protein kinase of the the RAM signaling network
YNL163C	RIA1	Y	N	NA	NA	NA	NA	NA	NA	NA	NA	NA	Cytoplasmic GTPase/eEF2-like factor involved in ribosomal biogenesis
YGR264C	MES1	Y	N	NA	NA	NA	NA	NA	NA	NA	NA	NA	Methionyl-tRNA synthetase
YGR267C	FOL2	Y	Y	NA	NA	NA	NA	NA	NA	NA	NA	NA	GTP-cyclohydrolase I, catalyzes first step in folic acid biosynthesis
YJL091C	GWT1	Y	N	NA	NA	NA	NA	NA	NA	NA	NA	NA	Protein involved in the inositol acylation of GlcN-PI
YOL102C	TPT1	Y	Y	NA	NA	NA	NA	NA	NA	NA	NA	NA	tRNA 2'-phosphotransferase that catalyzes final step in tRNA splicing
YOL120C	RPL18A	Y	N	NA	NA	NA	NA	NA	NA	NA	NA	NA	Ribosomal 60S subunit protein L18A
YPL131W	RPL5	Y	Y	NA	NA	NA	NA	NA	NA	NA	NA	NA	Ribosomal 60S subunit protein L5
YPR048W	TAH18	Y	N	NA	NA	NA	NA	NA	NA	NA	NA	NA	Conserved NAPDH-dependent diflavin reductase
YDL140C	RPO21	Y	Y	NA	NA	NA	NA	NA	NA	NA	NA	NA	RNA polymerase II largest subunit B220
YDL141W	BPL1	Y	Y	NA	NA	NA	NA	NA	NA	NA	NA	NA	Biotin:apoprotein ligase
YDL145C	COP1	Y	N	NA	NA	NA	NA	NA	NA	NA	NA	NA	Alpha subunit of COPI vesicle coatomer complex
YDL147W	RPN5	Y	Y	NA	NA	NA	NA	NA	NA	NA	NA	NA	Subunit of the CSN and 26S proteasome lid complexes
YDL153C	SAS10	Y	Y	NA	NA	NA	NA	NA	NA	NA	NA	NA	Subunit of U3-containing Small Subunit (SSU) processome complex
YDL220C	CDC13	Y	Y	NA	NA	NA	NA	NA	NA	NA	NA	NA	Single stranded DNA-binding protein found at TG1-3 telomere G-tails
YDL235C	YPD1	Y	Y	NA	NA	NA	NA	NA	NA	NA	NA	NA	Osmotic stress-responsive phosphorelay intermediate sensor protein
YDR037W	KRS1	Y	N	NA	NA	NA	NA	NA	NA	NA	NA	NA	Lysyl-tRNA synthetase
YDR047W	HEM12	Y	Y	NA	NA	NA	NA	NA	NA	NA	NA	NA	Uroporphyrinogen decarboxylase
YJR123W	RPS5	Y	N	NA	NA	NA	NA	NA	NA	NA	NA	NA	Protein component of the small (40S) ribosomal subunit
YLR430W	SEN1	Y	Y	NA	NA	NA	NA	NA	NA	NA	NA	NA	Presumed helicase and subunit of the Nrd1 complex (Nrd1p-Nab3p-Sen1p)
YLR440C	SEC39	Y	Y	NA	NA	NA	NA	NA	NA	NA	NA	NA	Component of the Dsl1p tethering complex
YBL105C	PKC1	Y	Y	NA	NA	NA	NA	NA	NA	NA	NA	NA	Protein serine/threonine kinase
YBR049C	REB1	Y	Y	NA	NA	NA	NA	NA	NA	NA	NA	NA	RNA polymerase I enhancer binding protein
YBR070C	ALG14	Y	Y	NA	NA	NA	NA	NA	NA	NA	NA	NA	Component of UDP-GlcNAc transferase
YGR046W	TAM41	Y	N	NA	NA	NA	NA	NA	NA	NA	NA	NA	Mitochondrial phosphatidate cytidylyltransferase (CDP-DAG synthase)
YIL083C	CAB2	Y	Y	NA	NA	NA	NA	NA	NA	NA	NA	NA	Subunit of the CoA-Synthesizing Protein Complex (CoA-SPC)
YKL195W	MIA40	Y	N	NA	NA	NA	NA	NA	NA	NA	NA	NA	Import and assembly protein in mitochondrial intermembrane space
YNL007C	SIS1	Y	Y	NA	NA	NA	NA	NA	NA	NA	NA	NA	Type II HSP40 co-chaperone that interacts with the HSP70 protein Ssa1p
YNL118C	DCP2	Y	Y	NA	NA	NA	NA	NA	NA	NA	NA	NA	Catalytic subunit of Dcp1p-Dcp2p decapping enzyme complex
YNR016C	ACC1	Y	N	NA	NA	NA	NA	NA	NA	NA	NA	NA	Acetyl-CoA carboxylase, biotin containing enzyme
YNR026C	SEC12	Y	N	NA	NA	NA	NA	NA	NA	NA	NA	NA	Guanine nucleotide exchange factor (GEF)
YNR035C	ARC35	Y	N	NA	NA	NA	NA	NA	NA	NA	NA	NA	Subunit of the ARP2/3 complex
YBR110W	ALG1	Y	N	NA	NA	NA	NA	NA	NA	NA	NA	NA	Mannosyltransferase
YBR117C	TKL2	Y	Y	NA	NA	NA	NA	NA	NA	NA	NA	NA	Transketolase
YBR136W	MEC1	Y	Y	NA	NA	NA	NA	NA	NA	NA	NA	NA	Genome integrity checkpoint protein and PI kinase superfamily member
YDL055C	PSA1	Y	N	NA	NA	NA	NA	NA	NA	NA	NA	NA	GDP-mannose pyrophosphorylase (mannose-1-phosphate guanyltransferase)
YDL087C	LUC7	Y	Y	NA	NA	NA	NA	NA	NA	NA	NA	NA	Essential protein associated with the U1 snRNP complex
YDL092W	SRP14	Y	Y	NA	NA	NA	NA	NA	NA	NA	NA	NA	Signal recognition particle (SRP) subunit
YDR460W	TFB3	Y	Y	NA	NA	NA	NA	NA	NA	NA	NA	NA	Subunit of TFIIH and nucleotide excision repair factor 3 complexes
YDR468C	TLG1	Y	N	NA	NA	NA	NA	NA	NA	NA	NA	NA	Essential t-SNARE that mediates fusion of vesicles with the late Golgi
YDR473C	PRP3	Y	Y	NA	NA	NA	NA	NA	NA	NA	NA	NA	Splicing factor
YML015C	TAF11	Y	Y	NA	NA	NA	NA	NA	NA	NA	NA	NA	TFIID subunit (40 kDa)
YPL146C	NOP53	Y	Y	NA	NA	NA	NA	NA	NA	NA	NA	NA	Nucleolar protein
YER171W	RAD3	Y	Y	NA	NA	NA	NA	NA	NA	NA	NA	NA	5' to 3' DNA helicase
YFR028C	CDC14	Y	Y	NA	NA	NA	NA	NA	NA	NA	NA	NA	Protein phosphatase required for mitotic exit
YGL099W	LSG1	Y	N	NA	NA	NA	NA	NA	NA	NA	NA	NA	Putative GTPase involved in 60S ribosomal subunit biogenesis
YGL123W	RPS2	Y	Y	NA	NA	NA	NA	NA	NA	NA	NA	NA	Protein component of the small (40S) subunit
YGL137W	SEC27	Y	N	NA	NA	NA	NA	NA	NA	NA	NA	NA	Essential beta'-coat protein of the COPI coatomer
YIL115C	NUP159	Y	Y	NA	NA	NA	NA	NA	NA	NA	NA	NA	FG-nucleoporin component of central core of the nuclear pore complex
YIL129C	TAO3	Y	N	NA	NA	NA	NA	NA	NA	NA	NA	NA	Component of the RAM signaling network
YMR217W	GUA1	Y	N	NA	NA	NA	NA	NA	NA	NA	NA	NA	GMP synthase
YNL152W	INN1	Y	N	NA	NA	NA	NA	NA	NA	NA	NA	NA	Essential protein that associates with contractile actomyosin ring
YNL306W	MRPS18	Y	N	NA	NA	NA	NA	NA	NA	NA	NA	NA	Mitochondrial ribosomal protein of the small subunit
YNL308C	KRI1	Y	Y	NA	NA	NA	NA	NA	NA	NA	NA	NA	Essential nucleolar protein required for 40S ribosome biogenesis
YOL130W	ALR1	Y	N	NA	NA	NA	NA	NA	NA	NA	NA	NA	Plasma membrane Mg(2+) transporter
YPR010C	RPA135	Y	Y	NA	NA	NA	NA	NA	NA	NA	NA	NA	RNA polymerase I second largest subunit A135
YNL272C	SEC2	Y	N	NA	NA	NA	NA	NA	NA	NA	NA	NA	Guanyl-nucleotide exchange factor for the small G-protein Sec4p
Q0050	aI1	NA	N	NA	NA	NA	NA	NA	NA	NA	NA	NA	Reverse transcriptase required for splicing of the COX1 pre-mRNA
Q0085	ATP6	NA	N	NA	NA	NA	NA	NA	NA	NA	NA	NA	ATP synthase
R0040C	REP2	NA	Y	NA	NA	NA	NA	NA	NA	NA	NA	NA	Master regulator that regulates transcript levels of the FLP1 gene
YAR033W	MST28	NA	N	NA	NA	NA	NA	NA	NA	NA	NA	NA	Putative integral membrane protein, involved in vesicle formation
YBR004C	GPI18	NA	N	NA	NA	NA	NA	NA	NA	NA	NA	NA	Functional ortholog of human PIG-V
YBR181C	RPS6B	NA	Y	NA	NA	NA	NA	NA	NA	NA	NA	NA	Protein component of the small (40S) ribosomal subunit
YDL031W	DBP10	NA	Y	NA	NA	NA	NA	NA	NA	NA	NA	NA	Putative ATP-dependent RNA helicase of the DEAD-box protein family
YDL058W	USO1	NA	N	NA	NA	NA	NA	NA	NA	NA	NA	NA	Essential protein involved in vesicle-mediated ER to Golgi transport
YDR025W	RPS11A	NA	N	NA	NA	NA	NA	NA	NA	NA	NA	NA	Protein component of the small (40S) ribosomal subunit
YDR498C	SEC20	NA	N	NA	NA	NA	NA	NA	NA	NA	NA	NA	Membrane glycoprotein v-SNARE
YER100W	UBC6	NA	Y	NA	NA	NA	NA	NA	NA	NA	NA	NA	Ubiquitin-conjugating enzyme involved in ERAD
YER105C	NUP157	NA	Y	NA	NA	NA	NA	NA	NA	NA	NA	NA	Subunit of the inner ring of the nuclear pore complex (NPC)
YER117W	RPL23B	NA	Y	NA	NA	NA	NA	NA	NA	NA	NA	NA	Ribosomal 60S subunit protein L23B
YFL005W	SEC4	NA	N	NA	NA	NA	NA	NA	NA	NA	NA	NA	Rab family GTPase
YGL007C-A	YGL007C-A	NA	N	NA	NA	NA	NA	NA	NA	NA	NA	NA	Putative protein of unknown function
YGL119W	COQ8	NA	N	NA	NA	NA	NA	NA	NA	NA	NA	NA	Protein required for ubiquinone biosynthesis and respiratory growth
YGL186C	TPN1	NA	N	NA	NA	NA	NA	NA	NA	NA	NA	NA	Plasma membrane pyridoxine (vitamin B6) transporter
YGL189C	RPS26A	NA	N	NA	NA	NA	NA	NA	NA	NA	NA	NA	Protein component of the small (40S) ribosomal subunit
YGL191W	COX13	NA	N	NA	NA	NA	NA	NA	NA	NA	NA	NA	Subunit VIa of cytochrome c oxidase
YGL204C	YGL204C	NA	N	NA	NA	NA	NA	NA	NA	NA	NA	NA	Protein of unknown function
YGR031C-A	NAG1	NA	N	NA	NA	NA	NA	NA	NA	NA	NA	NA	Protein involved in yeast cell wall biogenesis
YHR005C-A	TIM10	NA	N	NA	NA	NA	NA	NA	NA	NA	NA	NA	Essential protein of the mitochondrial intermembrane space
YHR071W	PCL5	NA	Y	NA	NA	NA	NA	NA	NA	NA	NA	NA	Cyclin
YHR137C-A	YHR137C-A	NA	N	NA	NA	NA	NA	NA	NA	NA	NA	NA	Dubious open reading frame
YIL151C	ESL1	NA	Y	NA	NA	NA	NA	NA	NA	NA	NA	NA	hEST1A/B (SMG5/6)-like protein
YJR143C	PMT4	NA	N	NA	NA	NA	NA	NA	NA	NA	NA	NA	Protein O-mannosyltransferase
YKL065W-A	YKL065W-A	NA	N	NA	NA	NA	NA	NA	NA	NA	NA	NA	Putative protein of unknown function
YLR419W	YLR419W	NA	N	NA	NA	NA	NA	NA	NA	NA	NA	NA	Putative helicase with limited sequence similarity to human Rb protein
YML081C-A	ATP18	NA	N	NA	NA	NA	NA	NA	NA	NA	NA	NA	Subunit of the mitochondrial F1F0 ATP synthase
YNL024C-A	KSH1	NA	N	NA	NA	NA	NA	NA	NA	NA	NA	NA	Essential protein suggested to function early in the secretory pathway
YNL048W	ALG11	NA	N	NA	NA	NA	NA	NA	NA	NA	NA	NA	Alpha-1,2-mannosyltransferase
YNR003W-A	YNR003W-A	NA	N	NA	NA	NA	NA	NA	NA	NA	NA	NA	Dubious open reading frame
YOL019W-A	YOL019W-A	NA	N	NA	NA	NA	NA	NA	NA	NA	NA	NA	Protein of unknown function
YOL083C-A	YOL083C-A	NA	N	NA	NA	NA	NA	NA	NA	NA	NA	NA	Dubious open reading frame
YOL140W	ARG8	NA	N	NA	NA	NA	NA	NA	NA	NA	NA	NA	Acetylornithine aminotransferase
YOL145C	CTR9	NA	Y	NA	NA	NA	NA	NA	NA	NA	NA	NA	Component of the Paf1p complex involved in transcription elongation
YOR161W-B	YOR161W-B	NA	N	NA	NA	NA	NA	NA	NA	NA	NA	NA	Protein of unknown function
YOR304C-A	BIL1	NA	N	NA	NA	NA	NA	NA	NA	NA	NA	NA	Protein that binds Bud6p and has a role in actin cable assembly
YOR314W-A	YOR314W-A	NA	N	NA	NA	NA	NA	NA	NA	NA	NA	NA	Dubious open reading frame
YOR335W-A	YOR335W-A	NA	N	NA	NA	NA	NA	NA	NA	NA	NA	NA	Dubious open reading frame
YPR080W	TEF1	NA	N	NA	NA	NA	NA	NA	NA	NA	NA	NA	Translational elongation factor EF-1 alpha
aEssential: Y = Yes, N = No, NA = Not available in yeast knock out collection
bNuclear localization: Y = Yes, N = No, according to localization gene ontology from Princeton GO server
