# Supplementary material for: Transcription factors induce differential splicing of duplicated ribosomal protein genes during meiosis
Source: Research Square preprint supplement (doi:10.21203/rs.3.rs-2355148/v1), 2023-01-12
Supplement: Supplementary file 3 [file e8ec0617c55aa3edd924c333.xlsx]

## Sheet: Table S3
Table S3. Primers used in this study
Name	Sequence 5' to 3'	Comments
S9A_i_for	CGACACTTCAGGTAAAGCGTTCCG	ddPCR of RPSA pre-mRNA
RPS9A-pre.qsc.R2	ATATGTTCTTGGGGCTCCTGTTTTAC	ddPCR of RPSA pre-mRNA
RPS9A_152bsp_for2	CAAAAGTATACAACATGCCAAGAGCC	ddPCR and qPCR of RPS9A mRNA
151_rev2	CGAATTCACCGGCCAACTTCAA	ddPCR and qPCR of RPS9A mRNA
RPS9B_i_for	CATTGAGTAGCACGACAACAGCCTG	ddPCR of RPS9B pre-mRNA
RPS9B-pre.qsc.R2	AGTTCTTGGAGCTCCTAAAAAAAAAAAAGT	ddPCR of RPS9B pre-mRNA
RPS9B_152bsp_for2	TAAGACTAAGCAACAATGCCAAGAGCT	ddPCR and qPCR of RPS9B mRNA
RPS9B_mature.qsc.R1	GGCAGCACGACGAATTTTAGACAAT	ddPCR and qPCR of RPS9B mRNA
RPS9A-pre.taqman.sc.fam.2	CGCATTCGTTTGAAAAAGAGAGCGCT	ddPCR of RPS9A intron
RPS9A.taqman.sc.hex.2	CAAGACTTACTCTACCCCAAAGAGACC	ddPCR of RPS9A mRNA
RPS9B-pre.taqman.sc.fam	ACTCCCGACACTTCAGTTAAACAGGGA	ddPCR of RPS9B intron
RPS9B.taqman.sc.hex	TAAGACTTACTCTACACCAAAGAGACC	ddPCR of RPS9B mRNA
RPR1_RT_for	GTGGGAAATTCGGTGGAACACAGTG	RIP amplification
RPR1_RT_rev1	GATAACAACGGTCGGTAAAGACTGGTTC	RIP amplification
RPS20_RT_for	Parenteau et al 2011	qPCR
RPS20_RT_rev	Parenteau et al 2011	qPCR
ARO3_RT_for	Parenteau et al 2019	qPCR
ARO3_RT_rev	Parenteau et al 2019	qPCR
ChrV-For	GGCTGTCAGAATATGGGGCCGTAGTA	ChIP amplification
ChrV-Rev	CACCCCGAAGCTGCTTTCACAATAC	ChIP amplification
S9A-chip-pro_for V2	CAGGTGAAATGTGTCTTGCCTAGAC	ChIP amplification
S9A-chip-pro_rev V2	GAAGATTTCTATCTCTTTGAAAATCAACAGGCC	ChIP amplification
S9A Chip 5'SS for	GAAATACAAAAGTATACAACATGCCAAGTACGTCG	ChIP amplification
S9A Chip 5'SS rev	GTATTCTATGAAGAACCGTCCATTATTGAAC	ChIP amplification
S9A_i_for	CGACACTTCAGGTAAAGCGTTCCG	ChIP amplification
S9A_i_rev	CACGTCACTGACGAATATGCATAATCCATG	ChIP amplification
S9A Chip 3'SS for	ATATTTATGTAGTGATCTTGATCCTCGCATTCG	ChIP amplification
151-152 RT for	TTGAAGTTGGCCGGTGAATTCG	ChIP amplification
152_RT_rev3	ATGGTGGACAGACTTGGCTAAACCTAG	ChIP amplification
S9A_RT3'_for1	GAGGCCGATGAAGAATAATTGTGCTGATTTTTATTTC	ChIP amplification
S9A_RT3'_rev	CGATAGTATTGTGAATACAACTCCCCTATCG	ChIP amplification
S9B-chip-pro_for V2	AAGCGGTGTTCCCCGCTGCGACG	ChIP amplification
S9B-chip-pro_rev V2	AACTTCATGAAATTTATGCATAATGCTTAATGGG	ChIP amplification
S9B Chip 5'SS for	CTAAGCAACAATGCCAAGTACGTATTAGAC	ChIP amplification
S9B Chip 5'SS rev	TCTCAAATATTTATGAGGACCCGAACCTCTTTC	ChIP amplification
S9B_i_for	CATTGAGTAGCACGACAACAGCCTG	ChIP amplification
S9B_i_rev	TTACGAGAGAGATGTTCCCTATTAGATCACCTTG	ChIP amplification
S9B-chip-3'SS_rev V2	TCCAAGGCGGATACCTAATTATGCG	ChIP amplification
151_RT_for3	TTGTTCGAAGGTAATGCCTTGATCAGAAGATTG	ChIP amplification
151_RT_rev3	GGACAGACTTGGCCAAACCCAA	ChIP amplification
S9B_RT3'_for1	CGAAGACGAAGAATAAATAATTCGCTGATTTCATAACTG	ChIP amplification
151_conf_rev	AAAGCGCCAGTTATGTACCTCTACC	ChIP amplification
DMC1 for	GGTGGGATATACACAGTCAATACCG	qPCR
DMC1 rev	TCATTGTCATTATTCCACCACCTAGG	qPCR
IME2_for	CGTAGTAGACAGAGTTCCAGTAGTGGC	qPCR
IME2_rev	CCCCTTATATCATGTTGTTTACCCAATATGTTCG	qPCR
SPS1 for	CCCTCCATCGAAGCTATATTCC	qPCR
SPS1 rev	CCGCAATATTCCATGACAATCC	qPCR
049_RT _for (GLC7)	Parenteau et al 2019	qPCR
049_BSP_rev (GLC7)	Parenteau et al 2019	qPCR
DIT1 for	AGACCAATGGCTCGACTTTATC	qPCR
DIT1 rev	TGTAACACACCCACGAATCTG	qPCR
SPS100 for	GCTTCTGCAACACCACTTTAC	qPCR
SPS100 rev	CAATGGAACGCCAGTTTGTG	qPCR
Gis1 for	CGATTCAACAACAAGCCAAGCGATGG	qPCR
Gis1 rev	CTGTGCCAAATCATAACAATCCTGCTGAC	qPCR
SSP2 for	CGATCAACAGCTTTGGAAAAGGCAGC	qPCR
SSP2 rev	GAAGAGCGGGATTCTGAGAACCTGC	qPCR
OSW2 for	CACCAGCAGCACAATTTCTAGGATGGAGAC	qPCR
OSW2 rev	TGTCGTTCGTGTAATCTGACAACAATCGAC	qPCR
D-RPS9A_for	GAGAGATTATCGTTATAAAGGCCTGTTGATTTTCAAAGAGAGATTGTACTGAGAGTGCAC	RPS9A deletion
D-S9A_rev2	CTCTACCATCTCGGTAACTTGAATGGTGACAAATATGTCGCCTCACCTCCTAGTCGAATGAAGGCAGTCACTGTGCGGTATTTCACACCG	RPS9A deletion
D-RPS9B_for	GCATAAATTTCATGAAGTTTACTTAATAAAATTGTTCATTTGCAGATTGTACTGAGAGTGCAC	RPS9B deletion
D-S9B_rev2	TAAGGATTTCTCCAAGCCAAGGTGTAAAATCCTAAACGCTACTGAGTTGCAGTTGGGAATTTAAATCCGACTGTGCGGTATTTCACACCG	RPS9B deletion
TAF14_del_for	AATATACCGTAATTTTTCTCCTTCGTGACCTCGGAGCTGACTGATATTAGATAACTAATC AGATTGTACTGAGAGTGCAC	strain construction
TAF14_del_rev	CGTGTTTTATTTATACAAACATAAAAGCGCGCATTTAACGCCCTTTTACCTTTTA CTGTGCGGTATTTCACACCG	strain construction
TAF14_conf_for	GACTCCTACAACAGTGGCTCTTGCG	strain construction
TAF14_conf_rev	CTTCTAGCAACCTGGTCCCCTCGTG	strain construction
RIM101_del_for	AAGATAAAATACTGAAAACGGTAAAGTAGGTTTGTTTAAATTGACTTAAGagattgtactgagagtgcac	strain construction
RIM101_del_rev	CTATACAGCCGCAAAGAAACAACTAAGAATAAAATATCCGACAATCCATActgtgcggtatttcacaccg	strain construction
RIM101_conf_for	GTTTCTAAAATTACGTCCGAGATGA	strain construction
RIM101_conf_rev	TTCACGAGGAACTTTACTATGAAGG	strain construction
SPS2-GFP for	TCAAAATGTCAGTTTATGCAGTTTTCAC	strain construction
SPS2-GFP rev	GCA AAT TTA TAT CTC ATA AGA ACT AAA TAA AAT GGC TAG	strain construction
