# Supplementary material for: Transcription factors induce differential splicing of duplicated ribosomal protein genes during meiosis
Source: Research Square preprint supplement (doi:10.21203/rs.3.rs-2355148/v1), 2023-01-12
Supplement: Supplementary file 4 [file f658747d5401a3401750877c.xlsx]

## Sheet: Table S2
Table S2. Description of plasmids used in this study
Plasmids	Description	Source
pHis-RPS9A	5' of RPS9A, His6 tag, Exon 1 of RPS9A, Intron of RPS9A, Exon 2 of RPS9A, 3'end of RPS9A	Petibon et al, 2016 (pH-A-AAA-A)
pHis-RPS9A-IRM2	5' of RPS9A, His6 tag, Exon 1 of RPS9A, Intron of RPS9A with Mango tag insertion, Exon 2 of RPS9A, 3'end of RPS9A	This study
pRS315	empty plasmid	Sikorski and Hieter, 1989
pYFP	RPS28A promoter, YFP coding sequence, ADH1 terminator	This study
pY-iA-FP	RPS28A promoter, YFP coding sequence with RPS9A intron , ADH1 terminator	This study
pY-iB-FP	RPS28A promoter, YFP coding sequence with RPS9B intron , ADH1 terminator	This study
